1 **Environment Shapes the Accessible Daptomycin Resistance Mechanisms in *Enterococcus***  
2 ***faecium***

3 Amy G. Prater<sup>a</sup>, Heer Mehtaa<sup>a</sup>, Abigael J. Kosgei<sup>a</sup>, William R. Miller<sup>b,c</sup>, Truc T. Tran<sup>b,c</sup>, Cesar A.  
4 Arias<sup>b,c,d,e,f</sup>, Yousif Shamoo<sup>a,#</sup>

5  
6 <sup>a</sup> Department of BioSciences, Rice University, Houston, TX, USA

7 <sup>b</sup> Center for Antimicrobial Resistance and Microbial Genomics, UTHealth McGovern Medical School,  
8 Houston, TX, USA

9 <sup>c</sup> Division of Infectious Diseases, UTHealth McGovern Medical School, Houston, TX, USA

10 <sup>d</sup> Molecular Genetics and Antimicrobial Resistance Unit, International Center for Microbial Genomics,  
11 Universidad El Bosque, Bogotá, Colombia

12 <sup>e</sup> Department of Microbiology and Molecular Genetics, UTHealth McGovern Medical School, Houston,  
13 TX, USA

14 <sup>f</sup> Center for Infectious Diseases, UTHealth, School of Public Health, Houston, TX, USA

15

16 Running Head: Environment Shapes *E. faecium* Daptomycin Resistance

17 <sup>#</sup> Corresponding author: Yousif Shamoo, Department of BioSciences, Rice University, 6100 Main St.,  
18 Houston, TX, [shamoo@rice.edu](mailto:shamoo@rice.edu)

19

20

21

22 **Abstract (250 words)**

23 Daptomycin binds to bacterial cell membranes and disrupts essential cell envelope processes  
24 leading to cell death. Bacteria respond to daptomycin by altering their cell envelopes to either  
25 decrease antibiotic binding to the membrane or by diverting binding away from vulnerable septal  
26 targets to remodeled anionic phospholipid membrane patches. In *Enterococcus faecalis*,  
27 daptomycin resistance is typically coordinated by the three-component cell-envelope-stress-  
28 response system, LiaFSR. Here, studying a clinical strain of multidrug-resistant *Enterococcus*  
29 *faecium* containing alleles associated with activation of the LiaFSR signaling pathway, we found  
30 that specific environments selected for different evolutionary trajectories leading to high-level  
31 daptomycin resistance. Planktonic environments favored pathways that increased cell surface  
32 charge via *yvcRS* upregulation of *dltABCD* and *mprF*, causing a reduction in daptomycin  
33 binding. Alternatively, environments favoring complex structured communities, including  
34 biofilms, evolved both diversion and repulsion strategies via *divIVA* and *oatA* mutations,  
35 respectively. Both environments subsequently converged on cardiolipin synthase (*cls*) mutations,  
36 suggesting the importance of membrane modification across strategies. Our findings indicate that  
37 *E. faecium* can evolve diverse evolutionary trajectories to daptomycin resistance that are shaped  
38 by the environment to produce a combination of resistance strategies. The accessibility of  
39 multiple and different biochemical pathways simultaneously suggests that the outcome of  
40 daptomycin exposure results in a polymorphic population of resistant phenotypes making *E.*  
41 *faecium* a recalcitrant pathogen.

42

43

44

## 45 **Introduction**

46           The rise of multidrug resistant (MDR) pathogens is one of the most pressing biomedical  
47 problems of this century. The Center for Disease Control (CDC) reports that 2 million antibiotic  
48 resistant infections resulting in 23,000 deaths occur each year (1). Vancomycin-resistant  
49 enterococci (VRE) cause approximately 1,300 deaths annually with the number of infections  
50 increasing substantially over the last 15 years (1). The Infectious Disease Society of America has  
51 listed *E. faecium* (*Efm*) among the no ‘ESKAPE’ pathogens (*Enterococcus faecium*,  
52 *Staphylococcus aureus*, *Klebsiella pneumoniae*, *Acinetobacter baumannii*, *Pseudomonas*  
53 *aeruginosa*, *Enterobacter* spp.) for which there is an urgent need for new therapies (2). *Efm*  
54 accounts for a significant amount of enterococcal health-care-associated infections, particularly  
55 in severely immunocompromised patients. *Efm* strains that are resistant to all anti-enterococcal  
56 antibiotics have been widely described (3–6), making these infections untreatable in certain  
57 scenarios (1, 3–5, 7, 8).

58           DAP is a bactericidal cyclic lipopeptide antibiotic approved in 2003 and used widely as a  
59 “rescue” drug against MDR Gram-positive organisms such as *Staphylococcus aureus*, *Efm* and  
60 *Enterococcus faecalis* (*Efc*) (4, 9, 10). While the DAP mechanism-of-action remains unclear,  
61 DAP acts in a calcium-dependent-manner, where the DAP:Ca<sup>+2</sup> complex binds to the cell  
62 membrane (CM) in a phosphatidylglycerol-dependent manner with high avidity for division  
63 septa. DAP binding has pleiotropic effects in the CM that include mislocalization of key proteins  
64 involved in cell wall and CM metabolism, and ultimately cell death (11–14). Unfortunately, DAP  
65 resistance is increasingly observed in the clinic. A clear understanding of the biochemical basis  
66 for resistance can potentially identify novel targets, therapeutic approaches, and diagnostic

67 markers for these MDR infections to restore the effectiveness of antibiotics (including DAP)  
68 against recalcitrant strains (15).

69 To date, the manner in which organisms evolve DAP resistance falls into three  
70 categories: “repulsion” from the cell surface (16–18), “diversion” of DAP binding away from the  
71 division septa (13, 15, 16, 18–20) and antibiotic hyperaccumulation in selected cells (seen in  
72 streptococci) (21) to protect the bacterial population. *S. aureus* predominately exploits repulsion,  
73 often mediated through gain-of-function mutations in the *dltABCD* operon and the multiple  
74 peptide resistance factor, *mprF* (16, 18, 20). Mutations in the *dltABCD* operon, responsible for  
75 incorporating D-alanine into lipoteichoic acids (LTA), often result in a more positively charged  
76 cell envelope and reduced DAP binding (18, 22, 23). Similarly, MprF catalyzes the transfer of a  
77 lysyl group to phosphatidylglycerol causing a net increase in cell surface charge and reduced  
78 DAP binding (18). Although, it has also been postulated that this reaction affects DAP  
79 susceptibility by decreasing the availability of phosphatidylglycerol for DAP binding (24). In  
80 contrast, *Efc* employs a different strategy that involves redistribution of anionic phospholipid  
81 microdomains away from the septum, to divert DAP from critical septal targets; this mechanism  
82 is mediated by the LiaFSR cell-envelope-stress-response system in association with cardiolipin  
83 synthase (*cls*) (15, 25, 26). Our initial mechanistic studies (27) suggest that DAP resistance in  
84 *Efm* is not mediated by membrane remodeling but rather involves repulsion of the antibiotic from  
85 the cell surface. Nonetheless, the LiaFSR system is involved in the *Efm* DAP response since  
86 deletion of the gene encoding the LiaR response regulator resulted in hypersusceptibility  
87 independent of the genetic background of the strain (28).

88 To deconstruct the potential resistance strategies available to *Efm*, we used specific  
89 adaptive environments to evolve the clinical strain, *Efm* HOU503 that harbors the most common

90 clinical LiaRS substitutions (LiaR<sup>W73C</sup> and LiaS<sup>T120A</sup>), which predispose system activation, to  
91 DAP resistance (29). Despite HOU503 being poised to exploit potential redistribution pathways  
92 via LiaFSR activation, we show that we can use the environment to favor different biochemical  
93 strategies. Unlike the evolution of *Efc* and *S. aureus* to DAP resistance, our work suggests that  
94 *Efm* is able to employ varying and different resistance strategies that may help explain the  
95 recalcitrant nature of these infections and the therapeutic challenges they pose (27).

96

## 97 **Results**

### 98 **Distinct adaptive environments select for divergent phenotypes and evolutionary** 99 **trajectories**

100 To favor distinct evolutionary trajectories that might be associated with the evolution of  
101 DAP resistance by *Efm* in the presence of LiaFSR substitutions, we performed experimental  
102 evolution using two different techniques that established a very different basis for the selection  
103 of adaptive phenotypes. We chose *Efm* HOU503 as the ancestor because it is a VAN resistant  
104 isolate (minimum inhibitory concentration (MIC) > 256 µg/ml) with a DAP MIC of 3 µg/ml and  
105 is poised to make the transition to clinical resistance (8). HOU503 contains mutated alleles  
106 within the LiaFSR pathway (LiaR<sup>W73C</sup> and LiaS<sup>T120A</sup>) that in combination increase the strength of  
107 LiaFSR signaling (29). Thus, this strain provided the ideal scenario to investigate subsequent and  
108 viable evolutionary trajectories upon antibiotic exposures when an initial step has been taken.

109 First, we evolved five HOU503 populations to DAP resistance using a traditional serial-  
110 flask transfer model where planktonic cells were transferred daily to increasing DAP  
111 concentrations. The stepwise increase in DAP concentration was performed below the current  
112 population MIC to allow the establishment of multiple evolutionary trajectories within the

113 population (25). The populations were passaged for a total of eight days with the final  
114 populations containing 8  $\mu\text{g/ml}$  DAP (resistant by clinical standards). The environment  
115 established by flask-transfer strongly reduces the selection for trajectories that might rely upon  
116 biofilm as cells that adhere to surfaces are less likely to be transferred.

117       Next, we evolved two, independent HOU503 populations to DAP resistance in a  
118 bioreactor where the vessel remained constant and the culture was maintained at its fastest  
119 growth rate. As in the flask-transfer experiments, the bioreactor population was subjected to  
120 stepwise increases in DAP concentration, below the population MIC to maintain diversity, until  
121 the final population was growing at 8  $\mu\text{g/ml}$  DAP, within 10 to 12 days. The bioreactor  
122 environment is, in many respects, the opposite of the flask-transfer environment, where cells that  
123 form biofilms or adhere to surfaces remain within the vessel, while planktonic cells, though still  
124 viable, are disadvantaged and can be washed out with a higher frequency. This production of  
125 biofilms contributes, in part, to the high level of polymorphism found within the bioreactor  
126 (Supplementary Text).

127       Following adaptation, two isolates from each of the five flask-transfer populations (10  
128 isolates total) were selected for whole genome sequencing (WGS) and phenotypic  
129 characterization. From each bioreactor-adapted population, 10 and 9 isolates, respectively, with  
130 distinct phenotypic properties (DAP MIC, cell density at stationary phase, and the ability to form  
131 floc) underwent WGS and further characterization (19 isolates total). Antibiotic cross-  
132 sensitivities were also tested and are discussed in the Supplementary Text and Table S1.

133       To confirm that each technique produced a different adaptive environment, we performed  
134 a crystal violet assay to quantify end-point isolate biofilm growth and assayed the growth rates of  
135 16 isolates with diverse genomes from both environments. As shown in Fig. 1A, bioreactor-

136 derived isolates produced up to 10-fold more biofilm than HOU503 and the flask-transfer  
137 isolates, consistent with growing in different adaptive environments. While the bioreactor-  
138 derived isolates typically formed strong biofilms, isolate R2P29 produced little biofilm,  
139 consistent with our previous studies showing that bioreactors can favor highly polymorphic  
140 populations and maintain planktonic sub-populations (25, 30–33). This isolate is discussed  
141 further in the Supplementary Text.

142 In addition to biofilm formation, the growth rates of each end-point isolate type differed  
143 (Fig. 1B). Flask-transfer isolates grew more slowly than both the ancestor and the bioreactor-  
144 adapted isolates, taking 8.6-11.9 hours to reach the mid-point of their final cell density whereas  
145 HOU503 took 8.5 hours and the bioreactor-derived isolates took 5.5-8.9 hours (Fig. 1B). Since  
146 the bioreactor is run as a turbidostat without nutrient limitation, the environment selects for both  
147 biofilm formation and rapid growth. As shown in Fig. 1, bioreactor-derived lineages have both a  
148 strong propensity to form biofilms and faster planktonic growth rates, consistent with the  
149 bioreactor selection conditions. Conversely, flask-transfer populations predominately remain in  
150 stationary phase and thus, growth rate was not favored. Note that while the bioreactor isolates  
151 appear to have reduced cell densities at later time points, the strong biofilms formed by these  
152 lineages reduce the accuracy of plate reader cell density readings due to the cells clumping and  
153 settling despite shaking. Together these data show that the adaptive environments established by  
154 the different experimental evolution approaches favored distinct phenotypes that could reveal  
155 potentially different evolutionary trajectories leading to DAP resistance.

156 **Flask-adapted HOU503 repeatedly evolved mutations within *yvcRS* that led to an increase**  
157 **in *dltABCD* and *mprF* transcripts, consistent with the repulsion phenotype**

158 Comparison of the 10 flask-transfer isolate WGS to HOU503 revealed the repeated  
159 evolution of mutations in *orf\_2375* or *orf\_2376*, which are annotated as homologs of the *yvcRS*  
160 system associated with bacitracin resistance in *Efc* and was recently found to be involved in *Efc*  
161 DAP resistance without a functional LiaFSR system (Table 1 and Supplementary Text) (34).  
162 Below, we report on the genomic mutations while plasmid dynamics are discussed in the  
163 Supplementary Text. YvcS is a transmembrane permease that senses bacitracin and, in  
164 conjunction with YvcR, a cytoplasmic ATPase, transmits the signal to the YxdK sensor kinase  
165 and YxdJ response regulator (34). This system shares significant similarity to the VraFG/GraSR  
166 system in *S. aureus* that upregulates both *dltABCD* and *mprF* in the presence of cationic  
167 antimicrobial peptides (CAMPs) (17). Interestingly, *yvcRS* in enterococci is located directly  
168 upstream of the *dltABCD* operon. Therefore, we hypothesized that, in *Efm*, YvcRS could  
169 regulate *dltABCD* and possibly *mprF*.

170 To test this hypothesis, we performed qPCR to measure the effect of *yvcRS* mutations on  
171 the transcription of *dltA* and *mprF*. As shown in Fig. 2, flask-transfer isolates had 2-9 fold  
172 increased *dltA* transcripts and 2-5 fold *mprF* transcripts when compared to the housekeeping  
173 gene: glucose-1-dehydrogenase 4, *gdhIV*. Furthermore, all *dlt* operon transcripts were  
174 upregulated in FT6 (*yvcR*<sup>H203Y</sup>, *cls*<sup>A20D</sup>) suggesting a link between the *dlt* operon and YvcRS  
175 (Fig. S1).

176 The isolates used for the assays in Fig. 2 and below contained one additional SNP outside  
177 *yvcRS*, making it difficult to assert causality for the mutations in *yvcRS* and the upregulation of  
178 the *dltABCD* and *mprF* transcripts. We report the genetic changes associated with DAP  
179 resistance within metagenomic analysis of the populations but with the caveat that other  
180 mutations can be present within the end-point isolates. For example, to evaluate the likely effects



181 of *yvcS* mutations, we characterized isolates FT2 (*yvcS*<sup>G133V</sup>, *pgsA*<sup>-62</sup>) and FT5 (*yvcS*<sup>S23I</sup>, *cls*<sup>R218Q</sup>)  
182 because the only common mutation between them was present in *yvcS*, suggesting that the *yvcS*  
183 mutations caused the increase in transcripts. Similarly, FT6 (*yvcR*<sup>H203Y</sup>, *cls*<sup>A20D</sup>) and FT10  
184 (*yvcR*<sup>G173C</sup>, *cls*<sup>A20D</sup>) were chosen to study the effects of *yvcR* mutations as the secondary  
185 mutation, *cls*<sup>A20D</sup>, is in the well-characterized *cls* gene. Mutations in *cls* are commonly found in  
186 the enterococcal DAP response and are associated with phospholipid “redistribution” (13, 35)  
187 and as shown in our later analyses, other lineages containing *cls*<sup>A20D</sup> had a strikingly different  
188 phenotype, suggesting that *cls*<sup>A20D</sup> could not be directly responsible for the phenotype observed  
189 here. By comparing strains with different secondary mutations, the basis of the conclusion  
190 linking potential upregulation of *dltABCD* or *mprF* is one of parsimony rather than direct  
191 causality.

192 **Isolates with mutations in *yvcRS* had a more positively charged cell surface and bound less**  
193 **BDP:DAP than the ancestor**

194 To determine if isolates containing *yvcRS* mutations possessed an increase in cell surface  
195 charge due to the upregulation of the *dltABCD* operon and *mprF*, flask-transfer isolates were  
196 incubated with the positively charged molecule, Poly-L-Lysine, conjugated to FITC (PLL:FITC)  
197 and cell fluorescence was quantified using fluorescence microscopy. Cells binding less  
198 PLL:FITC correlates with a more positively charged cell surface (36). All flask-transfer isolates  
199 tested bound 30-60% less PLL:FITC than the ancestor ( $p < 0.05$  using two-sided t-test), indicating  
200 that flask-transfer isolates produced a more positively charged cell surface and suggesting that  
201 the regulatory changes shown in Fig. 2 may lead to an increase in cell surface charge (Fig. 3A  
202 and Fig. S2). We also examined whether the isolates with mutations in *yvcRS*, bound less  
203 bodipy-DAP (BDP:DAP) than the ancestor. BDP:DAP is a conjugation of the fluorophore,

204 bodipy-FL, with DAP (BDP:DAP) and is used as a proxy for DAP binding (27, 28, 37). After  
205 incubation with 32  $\mu\text{g/ml}$  BDP:DAP, bound BDP:DAP was quantified using fluorescence  
206 microscopy (Fig. 3B-C). All flask-transfer isolates bound 53-70% less BDP:DAP than the  
207 ancestor ( $p < 0.05$  using two-sided t-test), supporting the hypothesis that mutations in *yvcRS* are  
208 associated with repulsion of DAP from the cell surface. Incubation with the anionic phospholipid  
209 dye, 10-N-nonyl acridine orange (NAO) (15, 38, 39) revealed no redistribution of phospholipid  
210 microdomains (Fig. S3).

### 211 **Adaptation in a bioreactor produced two main DAP resistance trajectories via mutations in** 212 ***divIVA* or *oatA***

213       Using methods described previously (25, 30–33) and more extensively in the  
214 Supplementary Text, two independent HOU503 populations were evolved to DAP resistance  
215 within 12 and 10 days (Population 1 and Population 2, respectively) in a bioreactor system that  
216 favors polymorphic populations and biofilm formation (25, 30, 31, 33). To identify the frequency  
217 of each mutation over time and the likely order of mutations, a polymorphic sample was taken  
218 daily for metagenomic deep sequencing (Fig. S4). Afterwards, 10 and 9 phenotypically diverse  
219 end-point isolates from Population 1 and 2, respectively, underwent WGS to identify the  
220 linkages between mutations (Tables 2-3). These end-point isolates were selected based upon  
221 phenotypic diversity to increase the chance of identifying diverse genotypes and, therefore, the  
222 percentage of end-point isolates carrying any particular mutation does not represent the  
223 frequency of that mutation within the entire population. By combining the daily frequencies with  
224 the genetic linkages from end-point isolates, adaptive timelines were created, detailing the likely  
225 sequence of events that resulted in DAP resistance (Fig. 4). Note that these trajectories do not  
226 include plasmid-associated mutations. Plasmids are easily transferred horizontally and, thus,

227 pinpointing a plasmid-encoded mutations' acquisition in different lineages is difficult  
228 (Supplementary Text)(40). Interestingly, several identical mutations were present on Day 1 of  
229 both populations (*rpoB*<sup>G32G</sup>, *purA*<sup>L409S</sup>, *ansP*<sup>-288</sup>, *tagB*<sup>R330S</sup>, *orf\_280*<sup>C84C</sup>, *orf\_2338*<sup>-276</sup>), suggesting  
230 heterogeneity at these loci in the ancestor. Because these mutations were present at high  
231 frequencies on Day 1, without DAP present, and their frequency fell upon the addition of DAP, it  
232 is likely that these mutations were not the result of DAP adaptation and were likely hitchhiker  
233 mutations. Thus, any mutations identified prior to the addition of DAP were removed from  
234 subsequent analysis.

235         Because mutations that arise early and at high frequency are those more likely to  
236 contribute to DAP resistance (25, 31–33), we identified *divIVA* and *oatA* as candidate genes for  
237 further study (Fig. 4). A common evolutionary trajectory within Population 1 was  $\Delta$ *orf\_2427*-  
238 2429, *divIVA*: a deletion of 1915 bps (hereafter referred to as  $\Delta$ 1915) that resulted in the  
239 truncation of the C-terminus of a putative *sepF* gene (residues 107-200), deletions of an S4  
240 domain containing gene and a *yygT* superfamily gene, and the N-terminus deletion of *divIVA*  
241 (residues 1-75). SepF forms ring structures at the division septum and directly interacts with FtsZ  
242 in *B. subtilis* (41, 42), while DivIVA acts as a scaffold in the septum formation complex and aids  
243 in chromosomal segregation by providing a scaffold at the cellular poles (43). In Population 2, a  
244 SNP in *divIVA* (Q75K) was the prominent allele, found in 69% of the population, suggesting the  
245 importance of changes in *divIVA* towards DAP resistance. Alternatively, mutations in *oatA* were  
246 observed in four end-point isolates in Population 1 and were prominent alleles, based on daily  
247 frequency data, during early adaptation in Population 2.

248         After the acquisition of the primary mutations above, mutations in *cls* were acquired and  
249 found in 13/19 end-point isolates comprising 36% and 61% of the final populations. The

250 emergence of mutations in *cls* closely mimics *Efc* adaptation to DAP, corroborating the  
251 important role of Cls in the evolution of DAP resistance, but only after an initial set of mutations  
252 establish a biochemical basis for their acquisition (25). See Supplementary Text for further  
253 allelic discussion.

254 **Bioreactor-derived isolates containing *divIVA* associated mutations produced abnormal**  
255 **division septa**

256 In total, 11 out of 19 bioreactor-derived isolates contained a mutation in *divIVA* that  
257 comprised 41% and 69% of the final day populations, respectively (Fig. 4, Tables 1-2, Fig. S4).  
258 In Population 1,  $\Delta 1915$  affected four genes, all of which had predicted functions involved in cell  
259 division, including N-terminal deletion of *divIVA*. The mutation observed in Population 2  
260 (Q75K) was in a predicted loop region of *divIVA* between the first two predicted helices of the  
261 N-terminal domain. Because the deletion affecting *divIVA* would result in a loss of function, we  
262 speculate that *divIVA*<sup>Q75K</sup> had reduced function, though this remains untested. Interestingly,  
263 *divIVA*<sup>Q75K</sup> was also identified in Population 1, though it was less successful than  $\Delta 1915$  (Fig.  
264 S4A). To understand how  $\Delta 1915$  affects DAP resistance, we evaluated isolate R1P79 ( $\Delta 1915$ ,  
265 *cls*<sup>R211L</sup>) as the only additional genomic mutation was *cls*<sup>R211L</sup>, which was also observed in a  
266 separate trajectory not containing mutations within *divIVA*: R1P50. To study *divIVA*<sup>Q75K</sup>, we  
267 used isolate R2P90, containing *divIVA*<sup>Q75K</sup> and *cls*<sup>A20D</sup> (the *cls* allele assessed in FT6 and FT10).

268 Using transmission electron microscopy (TEM), we found that the  $\Delta 1915$  and *divIVA*<sup>Q75K</sup>  
269 containing isolates had increased abnormal septation events and abnormal clustering or chaining  
270 (Fig. 5). We measured the number of cells with abnormal septation events compared to the  
271 ancestor to provide a quantitative metric and found that R1P79 ( $\Delta 1915$ , *cls*<sup>R211L</sup>) exhibited an  
272 increase in abnormal septation events from 9% (ancestor) to 82%, whereas R2P90 (*divIVA*<sup>Q75K</sup>,

273 *cls*<sup>A20D</sup>) produced 50% abnormal septation events (Fig. 5D). This suggests that  $\Delta$ 1915 produced a  
274 more severe phenotype – consistent with losing two additional genes associated with cell  
275 division and the truncation of the cell division allele *sepF* in addition to the loss of *divIVA*. It is  
276 important to note that isolates containing *cls*<sup>A20D</sup> and *cls*<sup>R211L</sup> did not have obvious septal defects  
277 in the presence of *yvcRS* mutations (Fig. 3), supporting the observation that changes in *divIVA*  
278 are associated with septal abnormalities.

### 279 **Bioreactor-derived isolates containing *divIVA* associated mutations produced differing** 280 **DAP resistance mechanisms**

281 We assayed PLL:FITC, BDP:DAP, and NAO binding to determine how mutations in  
282 *divIVA* resulted in DAP resistance. We found that R1P79 ( $\Delta$ 1915, *cls*<sup>R211L</sup>) bound similar  
283 PLL:FITC to the ancestor, yet bound BDP:DAP in a speckled manner, similar to that observed in  
284 DAP-resistant *Efc*, R712(44). Incubation with NAO also revealed a speckled phenotype,  
285 suggesting that  $\Delta$ 1915 resulted in a redistribution of lipid microdomains and DAP binding (Fig. 6  
286 and Fig. S2). Interestingly, R2P90 (*divIVA*<sup>Q75K</sup>, *cls*<sup>A20D</sup>) while producing aberrant septa showed  
287 different staining patterns: binding less PLL:FITC (suggesting a more positive surface), showing  
288 no NAO redistribution, and binding BDP:DAP in a strikingly bi-modal manner, reminiscent of  
289 streptococci (Fig. 6) (21). Only a subpopulation (approximately 10%) of cells bound  
290 significantly more BDP:DAP than the ancestor, whereas the remaining population did not have  
291 any discernable difference in drug binding (Fig. 6C). Thus, mechanistically, in R2P90  
292 (*divIVA*<sup>Q75K</sup>, *cls*<sup>A20D</sup>), DAP resistance appears to have been achieved by a combination of cell  
293 envelope changes associated with altered cell division and modest changes in cell surface charge  
294 resulting in hyperaccumulation of DAP in a subset of cells.

295

296 **Bioreactor-derived isolates with mutations in *oatA* had decreased peptidoglycan O-**  
297 **acetylation and increased cell surface charge, consistent with reduced BDP:DAP binding**

298 Seven different *oatA* mutations were observed between Bioreactor Population 1 and  
299 Population 2, six of which resulted in a truncation of the catalytic C-terminal domain (predicted  
300 residues 460-628). *OatA* catalyzes the acetylation of the C-6 hydroxyl group of *N*-acetylmuramic  
301 acid (MurNAc), which contributes to lysozyme resistance and is linked to increased pathogenesis  
302 in many species (45–47). Here, two different mutations were identified in end-point isolates:  
303 E480\* and E460\* (Table 2). All *oatA* mutations, combined, comprised 29% of the Population 1  
304 final day (Fig. S4). While *oatA* mutations were not observed in Population 2 end-point isolates,  
305 two separate *oatA* mutations (E598\* and E460\*) were prominent throughout the Population 2  
306 experiment (Fig. S4). Their combined presence remained at over 50% of the population between  
307 Days 5-7, but fell to 8% of the final day, as the mutation, *divIVA*<sup>Q75K</sup>, found greater success.

308 The isolates containing mutations in *oatA* had several additional mutations. We selected  
309 R1P50 (*oatA*<sup>E480\*</sup>, *cls*<sup>R211L</sup>, *rpoB*<sup>G32G</sup>, *purA*<sup>L409S</sup>, *ansP*<sup>-288</sup>, *tagB*<sup>R330S</sup>, *orf\_280*<sup>C84C</sup>, *orf\_2338*<sup>-276</sup>,  
310 *orf\_30*<sup>G25S</sup>) and R1P83 (*oatA*<sup>E460\*</sup>, *recA*<sup>A304S</sup>, *orf\_2207*<sup>V218A</sup>, *orf\_2597*<sup>Q74\*</sup>, *orf\_2689*<sup>G232V</sup>) for  
311 further analysis as the only shared mutation between these two end-point isolates were  
312 truncations of *oatA*. Isolates with either *oatA* mutation had increased sensitivity to lysozyme as  
313 tested via disc diffusion, suggesting a loss in catalytic activity and a likely decrease in  
314 peptidoglycan O-acetylation (Fig. 7A). Note that the high concentration of lysozyme in the two  
315 left discs caused the opaque halo around the disc, surrounded by the clearance of cells beyond.  
316 Additionally, we found that R1P50 and R1P83 bound 10% and 40% less PLL:FITC on average,  
317 respectively (Fig. 7B and Fig. S2) and bound less BDP:DAP (39% and 33%, respectively) than  
318 the ancestor (Fig. 7C-D). This suggests that the trajectories with *oatA* mutations conferred

319 increased DAP resistance via repulsion of DAP from the cell surface. Incubation with NAO  
320 revealed no evidence of phospholipid redistribution (Fig. S3). Thus, in both planktonic and  
321 biofilm-heavy environments, *Efm* was able to repulse DAP.

322 **After initial changes to establish either repulsion or redistribution, all evolutionary**  
323 **trajectories converged on alleles linked to membrane homeostasis.**

324         Regardless of adaptative technique or DAP resistance mechanism, after initial mutations  
325 were acquired, changes were made to genes affecting lipid/membrane homeostasis. The most  
326 commonly affected gene was *cls*, affecting three flask-transfer isolates, 13 bioreactor-derived  
327 isolates, and comprising 36% and 61% of the Population 1 and 2 final days, respectively. In  
328 flask-transfer isolates without a mutation in *cls*, mutations in glycerophosphoryl diester  
329 phosphodiesterase (*gdpD*), phosphatidylglycerol synthase (*pgsA*), or *orf\_1482* (upstream of a  
330 different putative *pgsA*, denoted *orf\_1481*) were observed, suggesting that while mutations to *cls*  
331 were more common, there were alternative evolutionary trajectories that affect membrane  
332 phospholipids that could potentially produce the same biological outcome. GdpD is a component  
333 of cell membrane phospholipid metabolism and *gdpD* mutations have been reported in clinical  
334 DAP resistant isolates *Efm* R494 and *Efc* R712 (I283P and  $\Delta$ I170, respectively) as well as in one  
335 flask-adapted populations here (*gdpD*<sup>H29R</sup>) (3, 39). A single G→A mutation was observed 62  
336 base pairs upstream of *pgsA* (*pgsA*<sup>-62</sup>) in FT1 and FT2. PgsA catalyzes the formation of  
337 phosphatidylglycerol-3-P from CDP-diacylglycerol and then converted to phosphatidylglycerol  
338 by PgpABC. DAP adaptive mutations in *pgsA* have previously been reported in streptococci, *S.*  
339 *aureus*, and *B. subtilis* that result in a loss of catalytic function or decrease in expression, causing  
340 a potential decrease in available phosphatidylglycerol for DAP binding (48). Here, we found  
341 that isolates containing mutations upstream of *pgsA* and the putative *pgsA* (mutation in *orf\_1482*

342 affecting *orf\_1481* expression) produced a very modest decrease in both transcripts, respectively  
343 (Fig. S5). It is possible that these transcript reductions result in less phosphatidylglycerol and  
344 contribute to DAP resistance.

345

## 346 **Discussion**

347 As MDR bacteria spread, physicians are increasingly forced to administer drugs-of-last-  
348 resort, such as DAP, causing resistance to these antibiotics to increase as well. It is predicted that  
349 the ascent of pan-resistant strains will result in a ‘post-antibiotic’ era in which many aspects of  
350 modern medicine would be threatened. In this work, we have mapped out the DAP resistance  
351 trajectories available to *Efm* poised to exploit *liaFSR*-mediated resistance (the most common  
352 pathway observed in clinical practice), showing how the environment impacts their acquisition  
353 and revealing the multi-layered nature of the resistance phenotype in this organism. Our results  
354 provide clarity to the complex and seemingly contradictory sets of observations surrounding the  
355 acquisition of DAP resistance in *Efm* and allow us to make important distinctions from *Efc* (5,  
356 27, 39).

357 Previously, it was found that *Efc* evolves DAP resistance through mutations in the *liaFSR*  
358 envelope-stress-response system and *cls* that divert DAP binding away from the division septum  
359 of cells via lipid remodeling. Mutations in these systems are seen in the clinic and in *in vitro*  
360 studies using both flask-transfers and bioreactors, suggesting that *Efc* evolves DAP resistance  
361 largely through phospholipid redistribution (25, 28, 44, 49, 50). Mutations within *Efm liaFSR*  
362 have also been observed but strains have not shown evidence of phospholipid redistribution(27).  
363 For example, *Efm* HOU503, used here, contains two alleles linked to increased DAP resistance  
364 (*liaR*<sup>W73C</sup> and *liaS*<sup>T120A</sup>) and exhibits tolerance to DAP, but, as shown in Fig. 3B, 6C, 7C, and



365 Fig. S3, neither BDP:DAP nor NAO were redistributed away from the division septa. While  
366 *liaR*<sup>73C</sup> and *liaS*<sup>120A</sup> may provide HOU503 with an ability to divert DAP, additional mutations  
367 were required for HOU503 to survive at higher DAP concentrations. Perhaps surprisingly, none  
368 of these additional mutations were present in *yycFG*, a highly conserved two-component system  
369 in which mutations have been observed in clinically derived DAP resistant isolates of *Efm* and *S.*  
370 *aureus* (26, 39). This suggests that adapting cells can increase resistance via *liaFSR* or *yycFG*  
371 mutations, but not both, implying that the systems could be redundant or engage in cross-talk  
372 that produces the same net outputs in signaling. The mutations reported here, after committing to  
373 *liaFSR*-associated resistance, predominately resulted in repulsion of DAP from the cell surface.  
374 However, in biofilm-heavy and rapid growth environments, HOU503 also diverted DAP binding  
375 from septal areas. This combination of resistance strategies marks a major difference between  
376 these two closely related species.

377 In support of the hypothesis that repulsion is a critical driver for DAP resistance in *Efm*,  
378 flask-adapted HOU503 repeatedly evolved mutations in the *yvcRS* multi-component system that  
379 resulted in the upregulation of the *dltABCD* operon and *mprF*, an increase in cell surface charge,  
380 and a reduction in DAP binding. These data suggest that YvcRS in enterococci may be  
381 analogous to the VraFG system in *S. aureus* which senses bacitracin and CAMPs in conjunction  
382 with GraXSR (potentially analogous to YxdJK in enterococci) to upregulate *dltABCD* and *mprF*  
383 and mediate the repulsion phenotype (17, 34, 51, 52).

384 Notably, our recent study that evolved *Efc* lacking the *liaR* response regulator to DAP  
385 resistance in flasks to identify *liaFSR*-independent DAP resistance mechanisms found that the  
386 two end-point isolates derived from that experiment contained a mutation in either *yvcR* or *yxdK*  
387 (53). These *Efc* isolates containing mutations in the *yxdJK*-*yvcRS* system did not exhibit an

388 increase in cell surface charge, did not have a reduction in DAP binding, and did not redistribute  
389 DAP binding. This phenomenon marks a potential difference between how *yvcRS* functions in  
390 enterococcal species, but more importantly, it highlights that when the LiaFSR pathway is  
391 disabled, alternate evolutionary trajectories can emerge in *Efc* as is seen here with the multitude  
392 of DAP resistance strategies employed by *Efm*. This adaptability also suggests that diverse  
393 signaling pathways that respond to environmental stress may be able to act indirectly to  
394 compensate for the loss or damage to other systems. Radeck and co-workers noted a similar  
395 layered compensatory network in the *B. subtilis* response to bacitracin (54).

396 In addition to *yvcRS*-mediated repulsion, we also found that changes in MurNAc acetylation  
397 through *oatA* mutations contributed to DAP resistance. It is important to note that loss of OatA  
398 function, may be illustrative of how repulsion can be achieved, but may be much less likely to  
399 occur in a clinical setting. The loss of acetylation leads to lysozyme sensitivity and would likely  
400 dramatically decrease pathogenicity, as the host innate immune system would be more effective  
401 at clearing this infection (46, 55).

402 While repulsion was the favored DAP resistance mechanism, redistribution of DAP  
403 binding was still observed in a biofilm-heavy environment through the 1915 bp deletion of cell  
404 division associated genes, including *divIVA*. The isolate containing this mutation had a dramatic  
405 increase in abnormal septation events, redistributed phospholipid microdomains, and diverted  
406 DAP binding. The frequent formation of division septa could have the net effect of decreasing  
407 the efficiency of DAP in disrupting division by simply increasing the number of potential targets  
408 for the antibiotic, ultimately diluting the DAP concentration within the membrane. Interestingly,  
409 abnormal septal defects are a common phenotype in DAP resistant isolates of both *Efc* and *Efm*  
410 (3, 53).

411 The role of the mutation *divIVA*<sup>Q75K</sup> in DAP resistance appears more complex and less  
412 clear than the other trajectories. While these cells have a higher frequency of aberrant septa  
413 compared to the ancestor, there was no diversion phenotype. Of note, *divIVA*<sup>Q75K</sup> was the only  
414 genotype that produced a strongly bimodal DAP binding phenotype. BDP:DAP stained cells  
415 showed a very distinct sub-population that “hyperaccumulated” DAP binding in a uniform  
416 manner similar to what has been seen in *Streptococcus mitis/oralis* where it was suggested that  
417 such a subpopulation may act as “super-binders” to bind significantly more DAP and thereby  
418 protect the surrounding population (21).

419 After acquiring the mutations that led to either repulsion or DAP diversion, mutations  
420 were subsequently acquired in *cls* or other genes associated with lipid/membrane chemistry. *Cls*  
421 mutations have been reported in DAP resistant isolates of both *Efm* and *Efc* (3, 25, 27). Here, we  
422 found *cls* mutations in both adaptive environments, showing their importance in contributing to  
423 DAP resistance. While a variety of mutations in *cls* were observed in the bioreactor (six), two of  
424 these mutations were also found in flask-adapted end-point isolates. Both H215R and R218Q  
425 have been found in clinical DAP resistant isolates of *Efm* (3). Previous work found that these *cls*  
426 mutations increase catalytic activity, creating more cardiolipin, but are neither necessary nor  
427 sufficient to confer DAP resistance (35, 39). Furthermore, we found that *cls* mutations were  
428 acquired after initial mutations in the *liaFSR* operon during *Efc* DAP adaptation (25). During  
429 *Efm* adaptation to DAP in the bioreactor, we again observed that changes to *cls* were acquired at  
430 a later stage, suggesting an ordered pathway, regardless of whether repulsion or diversion were  
431 being employed as the initial steps (25). While not directly conferring DAP resistance, it is clear  
432 that *cls* mutations play an important role in the enterococcal counterattack against DAP. The  
433 prevalence of these mutations in the clinic, across species (56), across adaptive environment, and

434 across DAP resistance mechanisms suggests that these alleles may act as good diagnostic DAP  
435 resistance markers in clinical infections.

436 In summary, we have shown here that the environment influences how *Efm* evolves DAP  
437 resistance, even with the presence of alleles that are associated with DAP diversion. More  
438 planktonic environments select for repulsion-mediated resistance via mutations to the *yvcRS*  
439 system that seem to play a role in *dltABCD* and *mprF* regulation. Conversely, environments that  
440 favor biofilm and more complex structured communities produce both repulsion and DAP  
441 diversion mechanisms, though DAP diversion appears less frequently. It is possible that these  
442 selective environments are representative of distinct *Efm* infection environments and may predict  
443 how different infections (i.e. bacteremia v. colonization of catheters/stents) will evolve DAP  
444 resistance. The unifying theme across resistance strategies, adaptive environments, and  
445 enterococcal species was mutations affecting membrane architecture, specifically in *cls*, which  
446 may have utility as a DAP resistance marker for clinicians.

447

## 448 **Materials and Methods**

449 **Flask-transfer adaptation.** Five populations of HOU503 were adapted to DAP resistance using  
450 100-fold dilutions each day. To start, five different colonies were used to inoculate each of the  
451 five populations containing Brain Heart Infusion (BHI) and Ca<sup>+</sup> (50 mg/L CaCl<sub>2</sub>). The following  
452 day, the populations were transferred to fresh tubes containing 1.5 µg/ml DAP (half the initial  
453 DAP MIC). After this, the populations were transferred to two tubes, containing either 1.5x or 2x  
454 the current DAP concentration. The tube with the best growth was then propagated into two new  
455 tubes. This model was followed until the populations were growing in 8 µg/ml DAP. At the end

456 of adaptation, each population was serially diluted onto non-selective BHI. Two isolates from  
457 each population were selected at random for WGS and further analysis.

458 **Directed evolution of *E. faecium* in a bioreactor.** Clinical isolate, *E. faecium* HOU503, was  
459 adapted to DAP resistance in two replicate runs in BHI with supplemented calcium (50 mg/L  
460 CaCl<sub>2</sub>). Experiments were completed in a Sartorius Stedum Biostat B Plus 1L vessel. A 200 ml  
461 culture volume was maintained which received an airflow of 0.2 lpm and was stirred at 100 rpm.  
462 The bioreactor was run as a turbidostat, maintaining constant cell density. However, due to the  
463 prevalence of biofilm in enterococcal cultures, optical density (OD) probes were rendered  
464 useless. To circumvent this problem, CO<sub>2</sub> was measured by a Magellan Tandem Pro Gas  
465 Analyzer and used as a proxy to monitor cell density and maintain logarithmic growth as  
466 described previously (25, 30, 31, 33). Manual OD measurements were taken periodically to  
467 ensure appropriate cell density. For inoculation, an overnight culture (ON) was grown from a  
468 single colony on non-selective media. 1 ml of this ON was then used for inoculating the vessel.  
469 The culture was initially grown in the absence of DAP to allow the cells to acclimate to the  
470 vessel. DAP was then added at half the initial MIC (1.5 µg/ml). Every two days, MIC testing via  
471 two-fold broth dilution was performed on a sample taken from the bioreactor to determine the  
472 subsequent DAP concentration. The DAP concentration was only increased in the vessel if the  
473 sample culture grew equally well in the higher DAP concentration as was observed in the  
474 current, working DAP concentration. By maintaining the population at sub-inhibitory levels of  
475 DAP, there is less selective pressure acting on the population, preventing a bottle-neck and  
476 allowing for more polymorphism within the population. Samples were taken daily and plated  
477 onto BHI and Bile Esculin Agar (BEA) to ensure that the vessel was not contaminated. 3-15 ml  
478 samples were taken daily and stored as pellets in -80°C alongside their corresponding

479 supernatants and a glycerol stock. At the end of each run, the population within the vessel was  
480 serially diluted and plated onto non-selective BHI agar. To identify phenotypic differences  
481 embodying potential different genetic trajectories, 90 isolates were chosen at random and  
482 underwent three phenotypic screens: 1) DAP MICs were determined via broth dilution, 2) cell  
483 densities at stationary phase were measured, 3) and propensity to grow as floc in broth was  
484 noted. Based on these three characteristics, 10 or 9 isolates from each run with diverse  
485 characteristics were selected for further characterization and WGS. For further details, see the  
486 Supplementary Text.

487 **Crystal violet biofilm assay.** ONs were used to inoculate fresh trypticase soy broth (TSB) and  
488 outgrown to  $OD_{600}$  0.5. These cultures were then used to inoculate TSB and grown for 16 hours  
489 at 37°C in a 96-well plate with shaking. Planktonic cells were aspirated, and the remaining  
490 biofilm was fixed with 99% methanol. Plates were washed three times with PBS and then air  
491 dried. The biofilm was stained with 0.2% crystal violet and incubated at room temperature for 15  
492 minutes. The crystal violet was removed followed by three additional PBS washings and allowed  
493 to air dry. Bound crystal violet was solubilized in 33% acetic acid and absorbance was measured  
494 at  $A_{570}$ . The assay was performed in triplicate.

495 **Growth rates.** ONs were normalized to  $OD_{600}$  0.05 and used to inoculate fresh BHI in a 96 well  
496 plate. Cells were grown within a BioTek Epoch2 microplate reader with orbital shaking at 37°C.  
497 Measurements were taken every five minutes for 24 hours. Assay was performed in biological  
498 triplicates.

499 **Isolating gDNA and library prep** The UltraClean Microbial DNA Isolation Kit (MoBio) was  
500 used for isolating gDNA from both end-point isolates and the daily population samples. Each  
501 end-point isolate was grown ON in 10 ml BHI and pelleted. Alternatively, the pellets collected

502 each day from the bioreactor and stored at  $-80^{\circ}\text{C}$  were thawed and immediately used for gDNA  
503 extraction to eliminate the possible effects of freeze/thaw on the outgrown population. In  
504 addition to the published protocol,  $5\ \mu\text{L}$  of  $5\ \text{U/mL}$  mutanolysin and  $12.5\ \mu\text{L}$  of  $200\ \text{mg/mL}$   
505 lysozyme were added to the sample suspended in the Microbead Solution and incubated at  $37^{\circ}\text{C}$   
506 for 1 hour. The Nexterra XT kit was used for the generation of paired-end libraries using  $2.5\ \mu\text{L}$   
507 gDNA and extending the tagmentation step to 9 minutes at  $55^{\circ}\text{C}$ . Libraries were sequenced by  
508 Genewiz on Hiseq with  $2\times 150\ \text{bp}$  reads. End-point isolates were sequenced with a minimum  
509  $100\times$  coverage and metagenomic sequences were sequenced with at least  $300\times$  coverage.

510 **Analyzing genomic sequencing.** Illumina short-reads were aligned to the ancestor, HOU503,  
511 using the Breseq-0.29.0 pipeline. Daily samples were analyzed utilizing the polymorphism  
512 command (-p) to identify the frequency of each mutation on a given day. Alleles that reached a  
513 minimum of 5% on any day were manually examined to ensure accurate mutation calling.

514 **qPCR.** Total RNA was extracted in accordance with the published Qiagen RNeasy Mini  
515 protocol with the addition of a 30-minute incubation at  $37^{\circ}\text{C}$  with mutanolysin and lysozyme to  
516 help break open the cells. Samples were DNase I treated in accordance with the Invitrogen  
517 protocol, using Taq PCR to confirm the removal of contaminating DNA. cDNA was synthesized  
518 using Invitrogen SuperScript III in accordance with manufacturer's instructions. qPCR was  
519 performed using Bio Rad iQ Sybr Green in accordance with manufacturer's instructions on a  
520 Bio-Rad CFX Connect Real-Time System. *gdhIV* was used as the housekeeping gene. Changes  
521 in expression were calculated using the  $2^{-\Delta\Delta CT}$  method. Experiments were performed in  
522 biological and technical triplicate.

523 **Poly-L-Lysine-FITC assay.** Isolates were grown overnight in BHI and then used to inoculate  
524 fresh tubes containing BHI. Cells were grown until they reached an  $\text{OD}_{600}$  0.5 and then washed 3

525 times in HEPES (20 mM, pH 7.0). Cells were then resuspended in HEPES to an OD<sub>600</sub> 0.1 and  
526 incubated with 10 µg/ml PLL:FITC, shaking at room temperature for 10 minutes. The culture  
527 was then washed once with HEPES to remove unbound PLL:FITC. Cells were resuspended in  
528 VectaShield and imaged on a Keyence BZ-Z710. Fluorescence per cell was calculated in ImageJ.  
529 Experiments were completed in duplicate on separate days.

530 **BDP:DAP.** The conjugation of the fluorophore, Bodipy-FI, to DAP was performed as described  
531 previously (37). In brief, DAP and BDP were incubated, shaking at room temperature in 0.2 M  
532 sodium carbonate buffer, pH 8.5, for one hour followed by extensive dialysis against dH<sub>2</sub>O at  
533 4°C. BDP:DAP was then incubated with different enterococci isolates with known different  
534 BDP:DAP binding patterns at different concentrations to confirm appropriate labeling. To  
535 determine BDP:DAP binding patterns, we used methods described previously (11, 12, 44, 57).  
536 Briefly, overnights of each isolate were used to inoculate fresh BHI containing Ca<sup>+</sup> and grown to  
537 OD<sub>600</sub> 0.5. Cells were then incubated with 32 µg/ml BDP:DAP for 20 minutes in the dark at  
538 37°C with shaking. Cells were washed once with HEPES (20 mM, pH 7.0). The labelled pellet  
539 was resuspended in VectaShield and mounted onto Poly-L-Lysine coated coverslips and imaged  
540 on a Keyence BZ-Z710 using a standard fluorescein isothio-cyanate (FITC) filter. Experiments  
541 were completed in duplicate on two separate days. Fluorescence per cell was calculated using  
542 ImageJ.

543 **10-N-Nonanyl acridine orange (NAO) staining.** NAO has been shown to preferentially bind  
544 anionic phospholipids in cell membranes and has been used previously to show phenotypes of  
545 phospholipid redistribution (15, 38, 44). Isolates were grown to early exponential phase (OD<sub>600</sub>  
546 0.2) in TSB and then incubated with 500 nM NAO at 37°C with shaking in the dark for 3.5  
547 hours. Cells were then washed three times in 0.9% saline, resuspended in VectaShield,



548 immobilized on Poly-L-Lysine coated coverslips, and visualized on the Keyence BZ-Z710  
549 microscope.

550 **Transmission Electron Microscopy.** Selected isolates were grown ON in BHI. 1 ml of culture  
551 was pelleted and washed 3 times in 0.1M Millonig's phosphate buffer. The pellet was then  
552 resuspended in 1 ml glutaraldehyde in Millonig's phosphate buffer and further processed by the  
553 University of Texas Health Science Center Electron Microscopy Core. Imaging was performed  
554 on a JEOL JEM 1200 EX Electron Microscope. To quantify abnormal septation, a minimum of  
555 25 "events" were selected in a field of view at 5000x and deemed normal or abnormal in  
556 appearance. This was repeated for 6 fields of views, resulting in the characterization of at least  
557 125 events.

558 **Antibiotic cross-sensitivity** All MICs were determined in triplicate via 2-fold broth dilution.  
559 Overnight (ON) cultures were grown at 37°C and shaking at 225 RPM. ONs were normalized to  
560 OD<sub>600</sub> 0.05 and 5 µl was used to inoculate 0.5 ml BHI with different concentrations of antibiotics  
561 and grown ON with shaking at 37°C. The lowest concentration with no visible bacterial growth  
562 was considered the MIC.

563 **Lysozyme Sensitivity.** ONs were used to inoculate fresh BHI and outgrown to OD<sub>600</sub> 0.5. These  
564 cultures were then used to plate a lawn onto BHI plates. Discs containing increasing lysozyme  
565 concentrations were overlain onto the lawn and incubated at 37°C for 48 hours.

566 **Data Availability.** All genomic sequences were submitted under PRJNA522390  
567 (<https://www.ncbi.nlm.nih.gov/bioproject/?term=PRJNA522390>).

568

569

570 **Acknowledgements**

571 This work was supported by National Institutes of Health, National Institute of Allergy and  
572 Infectious Diseases grants R01AI080714 to Y.S., K08 AI135093 to W.R.M., K24-AI121296 and  
573 R01-AI134637 to C.A.A., and K08-AI113317 to T.T. Funding agencies did not play a role in  
574 experimental design, performance or analysis.

575 A.G.P., H.M., Y.S., and C.A.A. contributed to experimental design and conceptualization.

576 A.G.P., H.M., and A.J.K. completed experiments. W.R.M. and T.T. aided in analysis and data  
577 acquisition. A.G.P., C.A.A. and Y.S. contributed to writing the manuscript.

578 **Competing Interests statement**

579 C.A.A. has received grants from Merck, MeMED Diagnostics, and Entasis Therapeutics.

580 W.R.M. has received a grant from Merck, and honoraria from Achaogen and Shionogi. T.T.  
581 has received a grant from Merck.

582

583 **References**

- 584 1. CDC. 2013. Antibiotic resistance threats in the United States, 2013.
- 585 2. Boucher HW, Talbot GH, Bradley JS, Edwards JE, Gilbert D, Rice LB, Scheld M,  
586 Spellberg B, Bartlett J. 2009. Bad Bugs, No Drugs: No ESKAPE! An Update from the  
587 Infectious Diseases Society of America. Clin Infect Dis 48:1–12.
- 588 3. Arias C a, Panesso D, McGrath DM, Qin X, Mojica MF, Miller C, Diaz L, Tran TT,  
589 Rincon S, Barbu EM, Reyes J, Roh JH, Lobos E, Sodergren E, Pasqualini R, Arap W,  
590 Quinn JP, Shamooy Y, Murray BE, Weinstock GM. 2011. Genetic basis for in vivo  
591 daptomycin resistance in enterococci. N Engl J Med 365:892–900.

- 592 4. Arias C a., Murray BE. 2012. The rise of the Enterococcus: beyond vancomycin  
593 resistance. *Nat Rev Microbiol*.
- 594 5. Hollenbeck BL, Rice LB. 2012. Intrinsic and acquired resistance mechanisms in  
595 enterococcus. *Virulence* 3:421–433.
- 596 6. Gilmore MS, Lebreton F, van Schaik W. 2013. Genomic transition of enterococci from  
597 gut commensals to leading causes of multidrug-resistant hospital infection in the antibiotic  
598 era. *Curr Opin Microbiol* 16:10–16.
- 599 7. Werth BJ, Barber KE, Ireland CE, Rybak MJ. 2014. Evaluation of ceftaroline,  
600 vancomycin, daptomycin, or ceftaroline plus daptomycin against daptomycin-  
601 nonsusceptible methicillin-resistant *Staphylococcus aureus* in an in vitro  
602 pharmacokinetic/pharmacodynamic model of simulated endocardial vegetations.  
603 *Antimicrob Agents Chemother* 58:3177–81.
- 604 8. Munita JM, Mishra NN, Alvarez D, Tran TT, Diaz L, Panesso D, Reyes J, Murray BE,  
605 Adachi J a., Bayer a. S, Arias C a. 2014. Failure of high-dose daptomycin for bacteremia  
606 caused by daptomycin-susceptible *Enterococcus faecium* harboring LiaSR substitutions.  
607 *Clin Infect Dis* 59:1277–1280.
- 608 9. FDA. 2003. Center for drug evaluation and research approval package for: application  
609 Number 21-572.
- 610 10. Miller WR, Murray BE, Rice LB, Arias CA. 2016. Vancomycin- resistant  
611 enterococci:therapeutic challenges in the 21st century. *Infect Dis Clin N Am* 30:415–439.
- 612 11. Hachmann A-B, Angert ER, Helmann JD. 2009. Genetic analysis of factors affecting  
613 susceptibility of *Bacillus subtilis* to daptomycin. *Antimicrob Agents Chemother* 53:1598–

- 614 1609.
- 615 12. Pogliano J, Pogliano N, Silverman JA. 2012. Daptomycin-mediated reorganization of  
616 membrane architecture causes mislocalization of essential cell division proteins. *J*  
617 *Bacteriol* 194:4494–4504.
- 618 13. Tran TT, Munita JM, Arias CA. 2015. Mechanisms of drug resistance : daptomycin  
619 resistance. *Ann N Y Acad Sci* 1354:32–53.
- 620 14. Müller A, Wenzel M, Strahl H, Grein F, Saaki TN V., Kohl B, Siersma T, Bandow JE,  
621 Sahl H-G, Schneider T, Hamoen LW. 2016. Daptomycin inhibits cell envelope synthesis  
622 by interfering with fluid membrane microdomains. *Proc Natl Acad Sci* 113:E7077–E7086.
- 623 15. Reyes J, Panesso D, Tran TT, Mishra NN, Cruz MR, Munita JM, Singh K V, Yeaman  
624 MR, Murray BE, Shamoo Y, Garsin D, Bayer AS, Arias CA. 2014. A *liaR* deletion  
625 restores susceptibility to daptomycin and antimicrobial peptides in multidrug-resistant  
626 *Enterococcus faecalis*. *J Infect Dis* 1–9.
- 627 16. Ernst CM, Staubitz P, Mishra NN, Yang S, Hornig G, Bayer AS, Kraus D, Peschel A.  
628 2009. The bacterial defensin resistance protein MprF consists of separable domains for  
629 lipid lysinylation and antimicrobial peptide repulsion. *PLOS Pathog* 5:1–9.
- 630 17. Falord M, Karimova G, Hiron A, Msadeka T. 2012. GraXSR proteins interact with the  
631 *VraFG* ABC transporter to form a five-component system required for cationic  
632 antimicrobial peptide sensing and resistance in *Staphylococcus aureus*. *Antimicrob Agents*  
633 *Chemother* 56:1047–1058.
- 634 18. Mishra NN, Yang SJ, Sawa A, Rubio A, Nast CC, Yeaman MR, Bayer AS. 2009.  
635 Analysis of cell membrane characteristics of in vitro-selected daptomycin-resistant strains

- 636 of methicillin-resistant *Staphylococcus aureus*. *Antimicrob Agents Chemother* 53:2312–  
637 2318.
- 638 19. Mishra NN, Bayer AS, Weidenmaier C, Grau T, Wanner S, Stefani A, Cafiso V,  
639 Bertuccio T, Yeaman MR, Nast CC, Yang SJ. 2014. Phenotypic and genotypic  
640 characterization of daptomycin-resistant methicillin-resistant *Staphylococcus aureus*  
641 strains: Relative roles of *mprF* and *dlt* operons. *PLoS One* 9:13–18.
- 642 20. Jones T, Yeaman MR, Sakoulas G, Yang SJ, Proctor R a., Sahl HG, Schrenzel J, Xiong  
643 YQ, Bayer AS. 2008. Failures in clinical treatment of *Staphylococcus aureus* infection  
644 with daptomycin are associated with alterations in surface charge, membrane phospholipid  
645 asymmetry, and drug binding. *Antimicrob Agents Chemother* 52:269–278.
- 646 21. Mishra NN, Tran TT, Seepersaud R, Garcia-de-la-Maria C, Faull K, Yoon A, Proctor R,  
647 Miro JM, Rybak MJ, Bayer AS, Arias CA. 2017. Perturbations of phosphatidate  
648 cytidyltransferase (*CdsA*) mediate daptomycin resistance in *Streptococcus mitis/oralis*  
649 by a novel mechanism. *Antimicrob Agents Chemother* 61:1–13.
- 650 22. Yang S, Kreiswirth BN, Sakoulas G, Yeaman MR, Yan Q, Sawa A, Bayer AS. 2010.  
651 Enhanced expression of *dltABCD* is associated with development of daptomycin  
652 nonsusceptibility in a clinical endocarditis isolate of *Staphylococcus aureus*. *J Infect Dis*  
653 200:1916–1920.
- 654 23. Bayer AS, Schneider T, Sahl H-G. 2013. Mechanisms of daptomycin resistance in  
655 *Staphylococcus aureus*: role of the cell membrane and cell wall. *ann N Y Acad Sci*  
656 1277:139–158.
- 657 24. Khatib TO, Stevenson H, Yeaman MR, Bayer AS, Pokorny A. 2016. Binding of

- 658 daptomycin to anionic lipid vesicles is reduced in the presence of lysyl-  
659 phosphatidylglycerol. *Antimicrob Agents Chemother* 60:5051–5053.
- 660 25. Miller C, Kong J, Tran TT, Arias CA, Saxer G, Shamoo Y. 2013. Adaptation of  
661 *Enterococcus faecalis* to daptomycin reveals an ordered progression to resistance.  
662 *Antimicrob Agents Chemother* 57:5373–5383.
- 663 26. Werth BJ, Steed ME, Ireland CE, Tran TT, Nonejuie P, Murray BE, Rose WE, Sakoulas  
664 G, Pogliano J, Arias C a, Rybak MJ. 2014. Defining daptomycin resistance prevention  
665 exposures in vancomycin-resistant *Enterococcus faecium* and *E. faecalis*. *Antimicrob*  
666 *Agents Chemother* 58:5253–5261.
- 667 27. Diaz L, Tran TT, Munita JM, Miller WR, Rincon S, Carvajal LP, Wollam A, Reyes J,  
668 Panesso D, Rojas NL, Shamoo Y, Murray BE, Weinstock GM, Ariasa C a. 2014. Whole-  
669 genome analyses of *Enterococcus faecium* isolates with diverse daptomycin MICs.  
670 *Antimicrob Agents Chemother* 58:4527–4534.
- 671 28. Panesso D, Reyes J, Gaston E, Deal M, Londoño A, Nigo M, Munita JM, Miller W,  
672 Shamoo Y, Tran TT, Arias C a. 2015. Deletion of *liaR* reverses daptomycin resistance in  
673 *Enterococcus faecium* independent of the genetic background. *Antimicrob Agents*  
674 *Chemother* AAC.01073-15.
- 675 29. Davlieva M, Wu C, Zhou Y, Arias CA, Shamoo Y. 2018. Two mutations commonly  
676 associated with daptomycin resistance in *Enterococcus faecium* LiaST120A and  
677 LiaRW73C appear to function epistatically in LiaFSR signaling. *Biochemistry* 57:6797–  
678 6805.
- 679 30. Hammerstrom TG, Beabout K, Clements TP, Saxer G, Shamoo Y. 2015. *Acinetobacter*

- 680 baumannii repeatedly evolves a hypermutator phenotype in response to tigecycline that  
681 effectively surveys evolutionary trajectories to resistance. PLoS One 10:1–24.
- 682 31. Beabout K, Hammerstrom TG, Wang TT, Bhatt M, Christie PJ, Saxer G, Shamooy Y.  
683 2015. Rampant parasexuality evolves in a hospital pathogen during antibiotic selection.  
684 Gene 1–33.
- 685 32. Mehta HH, Weng J, Prater AG, Elworth RAL, Han X, Shamooy Y. 2018. Pathogenic  
686 *Nocardia cyriacigeorgica* and *Nocardia nova* evolve to resist trimethoprim-  
687 sulfamethoxazole by both expected and unexpected pathways. Antimicrob Agents  
688 Chemother 62.
- 689 33. Mehta HH, Prater AG, Shamooy Y. 2017. Using experimental evolution to identify  
690 druggable targets that could inhibit the evolution of antimicrobial resistance. J Antibiot  
691 (Tokyo) 1–8.
- 692 34. Gebhard S, Fang C, Shaaly A, Leslie DJ, Weimar MR, Kalamorz F, Carne A, Cook GM.  
693 2014. Identification and characterization of a bacitracin resistance network in  
694 *Enterococcus faecalis*. Antimicrob Agents Chemother 58:1425–1433.
- 695 35. Davlieva M, Zhang W, Arias CA, Shamooy Y. 2013. Biochemical characterization of  
696 cardiolipin synthase mutations associated with daptomycin resistance in enterococci.  
697 Antimicrob Agents Chemother 57:289–296.
- 698 36. Hartmann W, Galla H-J. 1978. Binding of polylysine to charged bilayer membranes  
699 molecular organization of a lipid:peptide complex. North Holl Biomed Press 509:474–  
700 490.
- 701 37. Pader V, Hakim S, Painter KL, Wigneshweraraj S, Clarke TB, Edwards AM. 2016.

- 702           Staphylococcus aureus inactivates daptomycin by releasing membrane phospholipids. *Nat*  
703           *Microbiol* 2.
- 704   38.   Barák I, Muchová K. 2013. The role of lipid domains in bacterial cell processes. *Int J Mol*  
705           *Sci* 14:4050–4065.
- 706   39.   Tran TT, Panesso D, Gao H, Roh JH, Munita JM, Reyes J, Diaz L, Lobos E a., Shamoo Y,  
707           Mishra NN, Bayer AS, Murray BE, Weinstock GM, Arias C a. 2013. Whole-genome  
708           analysis of a daptomycin-susceptible *Enterococcus faecium* strain and its daptomycin-  
709           resistant variant arising during therapy. *Antimicrob Agents Chemother* 57:261–268.
- 710   40.   Palmer KL, Kos VN, Gilmore MS. 2010. Horizontal gene transfer and the genomics of  
711           enterococcal antibiotic resistance. *Curr Opin Microbiol* 13:632–639.
- 712   41.   Hamoen LW, Meile J, Jong W De, Noirot P, Errington J. 2006. SepF , a novel FtsZ-  
713           interacting protein required for a late step in cell division. *Mol Microbiol* 59:989–999.
- 714   42.   Gundogdu ME, Kawai Y, Pavlendova N, Ogasawara N, Errington J, Scheffers D. 2011.  
715           Large ring polymers align FtsZ polymers for normal septum formation. *EMBO J* 617–626.
- 716   43.   Pinho MG, Kjos M, Veening J. 2013. How to get (a)round: mechanisms controlling  
717           growth and division of coccoid bacteria. *Nat Publ Gr* 11:601–614.
- 718   44.   Tran TT, Panesso D, Mishra NN, Mileykovskaya E, Guan Z, Munita JM, Reyes J, Diaz L,  
719           Weinstock GM, Murray BE, Shamoo Y, Dowhan W, Bayer AS, Arias CA. 2013.  
720           Daptomycin-resistant *Enterococcus faecalis* diverts the antibiotic molecule from the  
721           division septum and remodels cell membrane. *MBio* 4:1–10.
- 722   45.   Sychantha D, Jones CS, Little DJ, Moynihan PJ, Robinson H, Galley NF, Roper DI,  
723           Dowson CG, Howell PL, Clarke AJ. 2017. In vitro characterization of the antivirulence



- 724 target of Gram-positive pathogens, peptidoglycan O-acetyltransferase A (OatA). PLoS  
725 Pathog 13:1–26.
- 726 46. Bera A, Herbert S, Jakob A, Vollmer W, Götz F. 2005. Why are pathogenic staphylococci  
727 so lysozyme resistant? The peptidoglycan O-acetyltransferase OatA is the major  
728 determinant for lysozyme resistance of *Staphylococcus aureus*. *Mol Microbiol* 55:778–  
729 787.
- 730 47. Sychantha D, Clarke AJ. 2018. Peptidoglycan modification by the catalytic domain of  
731 *Streptococcus pneumoniae* OatA follows a ping-pong bi-bi mechanism of action.  
732 *Biochemistry* 57:2394–2401.
- 733 48. Peleg AY, Miyakis S, Ward D V., Earl AM, Rubio A, Cameron DR, Pillai S, Moellering  
734 RC, Eliopoulos GM. 2012. Whole genome characterization of the mechanisms of  
735 daptomycin resistance in clinical and laboratory derived isolates of *staphylococcus aureus*.  
736 *PLoS One* 7.
- 737 49. Davlieva M, Shi Y, Leonard PG, Johnson T a., Zianni MR, Arias C a., Ladbury JE,  
738 Shamoo Y. 2015. A variable DNA recognition site organization establishes the LiaR-  
739 mediated cell envelope stress response of enterococci to daptomycin. *Nucleic Acids Res*  
740 43:4758–4773.
- 741 50. Palmer KL, Daniel A, Hardy C, Silverman J, Gilmore MS, Al PET. 2011. Genetic basis  
742 for daptomycin resistance in Enterococci. *Antimicrob Agents Chemother* 55:3345–3356.
- 743 51. Meehl M, Herbert S, Go F, Cheung A. 2007. Interaction of the GraRS two-component  
744 system with the VraFG ABC transporter to support vancomycin-intermediate resistance in  
745 *Staphylococcus aureus* □. *Antimicrob Agents Chemother* 51:2679–2689.

- 746 52. Dintner S, Heermann R, Fang C, Jung K, Gebhard S. 2014. A sensory complex consisting  
747 of an ATP-binding cassette transporter and a two-component regulatory system controls  
748 bacitracin resistance in *Bacillus subtilis*. *J Biol Chem* 289:27899–27910.
- 749 53. Miller WR, Tran TT, Diaz L, Rios R, Khan A, Reyes J, Prater AG, Panesso D, Shamoo Y,  
750 Arias CA. 2019. LiaR-independent pathways to daptomycin resistance in *Enterococcus*  
751 *faecalis* reveal a multilayer defense against cell envelope antibiotics. *Mol Microbiol* 0:1–  
752 14.
- 753 54. Radeck J, Gebhard S, Orchard PS, Kirchner M, Bauer S, Mascher T, Fritz G. 2016.  
754 Anatomy of the bacitracin resistance network in *Bacillus subtilis*. *Mol Microbiol* 100:607–  
755 620.
- 756 55. Herbert S, Bera A, Nerz C, Kraus D, Peschel A, Goerke C, Meehl M, Cheung A, Götz F.  
757 2007. Molecular basis of resistance to muramidase and cationic antimicrobial peptide  
758 activity of lysozyme in staphylococci. *PLoS Pathog* 3:0981–0994.
- 759 56. Jiang J, Bhuiyan S, Shen H, Cameron DR, Rupasinghe TWT. 2019. Antibiotic resistance  
760 and host immune evasion in *Staphylococcus aureus* mediated by a metabolic adaptation.  
761 *PNAS* 116.
- 762 57. Hachmann AB, Sevim E, Gaballa A, Popham DL, Antelmann H, Helmann JD. 2011.  
763 Reduction in membrane phosphatidylglycerol content leads to daptomycin resistance in  
764 *Bacillus subtilis*. *Antimicrob Agents Chemother* 55:4326–4337.
- 765
- 766
- 767

768 **Figure Legends**

769 **Fig. 1: Varying the adaptive environment selects for distinctive and divergent phenotypes.**

770 The bioreactor (red) and flask (blue) environments evolve distinctly different phenotypes. **A.** A  
771 crystal violet assay was used to quantify biofilm formation of 16 end-point isolates and is  
772 reported as the fold change crystal violet Abs<sub>570</sub> over the ancestor. All bioreactor isolates (except  
773 R2P29) produced significantly more biofilm than the ancestor ( $p < 0.05$ ) using two-sided T-test.  
774 Error bars represent standard deviation. **B.** Growth rates were performed in a microplate reader  
775 in triplicate for all end-point isolates. The dark red and blue markers indicate the average growth  
776 for each adaptive environment with the lighter shades showing the average growth of individual  
777 isolates.

778 **Fig. 2: Flask-transfer isolates with mutations in *yvcRS* had upregulated *dltA* and *mprF***

779 **transcripts.** qPCR was used to measure transcript levels of flask-transfer isolates using *gdhIV* as  
780 reference. **A.** *dltA* transcript levels compared to ancestor. **B.** *mprF* transcript levels compared to  
781 ancestor.

782 **Fig. 3: Isolates with mutations in *yvcRS* had a more positively charged cell surface and**

783 **bound less BDP:DAP than the ancestor, HOU503.** **A** The relative cell surface charge was  
784 determined by incubation with PLL:FITC. Cells that bind less PLL:FITC have a more positive  
785 cell surface charge. \*Shows statistical significance ( $p < 0.05$ ) using two-sided T-test. ImageJ was  
786 used for quantification. Physical images can be viewed in Fig. S2. **B.** Isolates were incubated  
787 with BDP:DAP to determine DAP binding patterns. **C.** Quantification of BDP:DAP binding per  
788 cell. \*Shows statistical significance ( $p < 0.05$ ) using two-sided T-test. ImageJ was used for  
789 quantification.

790 **Fig. 4: Adaption within a bioreactor environment favoring rapid growth and biofilm**  
791 **formation produced two predominant evolutionary trajectories.** Combining the WGS data  
792 from end-point isolates that identified genetic linkage with the metagenomic frequency data over  
793 time, established the likely sequence of events that resulted in DAP resistant trajectories. Dashed  
794 lines indicate that the frequency of the subsequent mutation(s) identified in specific end-point  
795 isolates were below the level of detection (<3%) in the overall bioreactor population. The low  
796 frequency of these mutations within the population suggests that they were acquired towards the  
797 end of adaptation. The DAP concentration each day of the experiment is across the top, in gray.  
798 Final DAP MICs of each trajectory are denoted in red at the right. **A.** Population 1 evolved 2  
799 main trajectories opening with either a mutation in *oatA* or  $\Delta 1915$  followed by additional  
800 mutations, including *cls*. **B.** Population 2 evolved one main trajectory with a mutation in *divIVA*  
801 followed by mutations in *cls*.

802 **Fig. 5: Bioreactor isolates containing *divIVA* associated mutations produced abnormal**  
803 **septa. A.** TEM was used at 5000x (left) and 50000x (right) to observe cellular morphology of  
804 end-point isolates containing mutations in *divIVA*. **B.** The percent of abnormal septal events was  
805 determined. \*Shows statistical significance ( $p < 0.05$ ) using two-sided T-test.

806 **Fig. 6: Bioreactor Isolates with *divIVA* associated mutations produced more complex DAP**  
807 **resistance phenotypes. A.** The relative cell surface charge was determined by incubating the  
808 isolates with PLL:FITC Cells that bind less PLL:FITC have a more positive cell surface charge  
809 R2P90 bound significantly less PLL:FITC than the ancestor indicating a more positively charged  
810 cell surface. \*Shows statistical significance ( $p < 0.05$ ) using two-sided T-test. Physical images can  
811 be viewed in Supplementary Fig. 2. **B.** Quantification of BDP:DAP binding per cell using  
812 ImageJ. \*Shows statistical significance ( $p < 0.05$ ) using two-sided T-test. **C.** Isolates were

813 incubated with BDP:DAP to determine DAP binding patterns. *EEfc* R712 acts as a control to  
814 show the redistribution of binding phenotype. **D.** Isolates were incubated with NAO to determine  
815 phospholipid microdomain patterning. *Efc* R712 acts as a control to show the redistribution  
816 phenotype.

817 **Fig. 7: Bioreactor-derived isolates with mutations in *oatA* had decreased peptidoglycan O-**  
818 **acetylation and increased cell surface charge, consistent with reduced BDP:DAP binding.**

819 **A.** Lysozyme discs containing decreasing concentrations (200, 100, 10, 0 mg/ml) were overlaid

820 on bacterial lawns. R1P50 and R1P83 both have larger zones of inhibition around lysosome

821 soaked discs indicating a loss in O-acetylation. **B.** The relative cell surface charge was

822 determined by incubating the isolates with PLL:FITC. Cells that bind less PLL:FITC have a

823 more positive cell surface charge. \*Shows statistical significance ( $p < 0.05$ ) using two-sided T-

824 test. ImageJ was used for quantification. Physical images can be viewed in Supplementary Fig.

825 2. **C.** Isolates were incubated with BDP:DAP to determine DAP binding patterns. **D.**

826 Quantification of BDP:DAP binding per cell. \*Shows statistical significance ( $p < 0.05$ ) using two-

827 sided T-test. ImageJ was used for quantification.

828

829

830

831

832

833

834

835 **Tables**

836 **Table 1: Flask-transfer isolate genomes.**

| Isolate                           | DAP MIC | VAN Plasmid | <i>orf_2376</i> | <i>orf_2375</i> | <i>cls</i> | <i>gdpD</i> | <i>pgsA</i> | <i>orf_1482</i> |
|-----------------------------------|---------|-------------|-----------------|-----------------|------------|-------------|-------------|-----------------|
| FT1                               | 32      | Δ           | G133V           |                 |            |             | -62         |                 |
| FT2                               | 32      | Δ           | G133V           |                 |            |             | -62         |                 |
| FT3                               | 32      | Δ           | T156I           |                 |            |             |             | F130L           |
| FT4                               | 32      | Δ           | T156I           |                 |            |             |             | F130L           |
| FT5                               | 32      | Δ           | S23I            |                 | R218Q      |             |             |                 |
| FT6                               | 32      |             |                 | H203Y           | A20D       |             |             |                 |
| FT7                               | 17      | Δ           | I576N           |                 |            | H29R        |             |                 |
| FT8                               | 32      | Δ           | I576N           |                 |            | H29R        |             |                 |
| FT9*                              | 32      | Δ           | T156I           |                 |            |             |             | F130L           |
| FT10                              | 32      | Δ           |                 | G173C           | A20D       |             |             |                 |
| <b>Total Strains with Changes</b> |         | <b>9</b>    | <b>7</b>        | <b>2</b>        | <b>3</b>   | <b>2</b>    | <b>2</b>    | <b>2</b>        |

837 \*Additional changes may be present within this genome. See Supplementary Text.

838

839 **Table 2: Bioreactor-derived Population 1 end-point isolate genomes.**

| Isolate                           | DAP MIC | VAN Plasmid | <i>cls</i> | <i>Orf_2427-2429, divIVA</i> | <i>repA</i> (Plasmid 1) | <i>outA</i>                               | <i>rpoB</i> | <i>purA</i> | <i>ansP</i> | <i>tagB</i> | <i>orf_280</i> | <i>orf_2338</i> | <i>orf_30</i> | <i>engA</i> | <i>orf_1326</i> | <i>orf_1306</i> | <i>recA</i> | <i>treP</i> | <i>gatA</i> | <i>orf_2207</i> | <i>sdhA</i> | <i>dhc</i> | <i>orf_2477</i> | <i>orf_2597</i> | <i>orf_2689</i> | <i>orf_2709</i> (Plasmid 1) | <i>orf_2744</i> (Plasmid 1) |          |  |  |  |
|-----------------------------------|---------|-------------|------------|------------------------------|-------------------------|-------------------------------------------|-------------|-------------|-------------|-------------|----------------|-----------------|---------------|-------------|-----------------|-----------------|-------------|-------------|-------------|-----------------|-------------|------------|-----------------|-----------------|-----------------|-----------------------------|-----------------------------|----------|--|--|--|
| R1P58                             | 32      |             |            |                              |                         |                                           |             |             |             |             |                |                 |               |             |                 |                 |             |             | -53 V64G    |                 |             |            |                 |                 |                 |                             |                             |          |  |  |  |
| R1P79                             | 32      | Δ           | R211L      | Δ1915 BP                     |                         |                                           |             |             |             |             |                |                 |               |             |                 |                 |             |             |             |                 |             |            |                 |                 |                 |                             |                             |          |  |  |  |
| R1P7                              | 32      | Δ           | R218Q      | Δ1915 BP                     | +207                    |                                           |             |             |             |             |                |                 |               |             |                 |                 |             |             |             |                 |             | R175K      |                 |                 |                 |                             |                             |          |  |  |  |
| R1P50                             | 32      | Δ           | R211L      |                              |                         | E480* G32GL409S -288 R330S C84C -276 G25S |             |             |             |             |                |                 |               |             |                 |                 |             |             |             |                 |             |            |                 |                 |                 |                             |                             |          |  |  |  |
| R1P46                             | 32      | Δ           | G43E       |                              | +207                    | E480* G32GL409S -288 R330S C84C -276      |             |             |             |             |                |                 |               |             |                 |                 |             |             |             |                 |             |            |                 |                 |                 |                             |                             |          |  |  |  |
| R1P83                             | 16      | Δ           |            |                              |                         | E460*                                     |             |             |             |             |                |                 |               |             |                 |                 | A304S       |             |             |                 | V218A       |            |                 |                 |                 |                             | Q74* G232V                  |          |  |  |  |
| R1P49                             | 16      | Δ           | R211L      | Δ1915 BP                     | +207                    |                                           |             |             |             |             |                |                 |               |             |                 |                 |             |             |             |                 |             |            | E10*            |                 |                 |                             |                             |          |  |  |  |
| R1P70                             | 16      | Δ 6203 bp   | R54H       |                              | +216                    | E480* G32GL409S -288 R330S C84C -276      |             |             |             |             |                |                 |               |             |                 |                 | A483T       |             |             |                 |             |            |                 |                 |                 |                             |                             |          |  |  |  |
| R1P17                             | 8       |             |            |                              |                         |                                           |             |             |             |             |                |                 |               | L49V        |                 | A381A           |             |             |             |                 |             |            |                 |                 |                 |                             |                             |          |  |  |  |
| R1P77                             | 8       | Δ           | R211L      | Δ1915 BP                     |                         |                                           |             |             |             |             |                |                 |               |             |                 |                 |             |             |             |                 |             |            |                 |                 |                 |                             |                             |          |  |  |  |
| <b>Total Strains with Changes</b> |         | <b>8</b>    | <b>7</b>   | <b>4</b>                     | <b>4</b>                | <b>4</b>                                  | <b>3</b>    | <b>3</b>    | <b>3</b>    | <b>3</b>    | <b>3</b>       | <b>3</b>        | <b>1</b>      | <b>1</b>    | <b>1</b>        | <b>1</b>        | <b>1</b>    | <b>1</b>    | <b>1</b>    | <b>1</b>        | <b>1</b>    | <b>1</b>   | <b>1</b>        | <b>1</b>        | <b>1</b>        | <b>1</b>                    | <b>1</b>                    | <b>1</b> |  |  |  |

840

841

842

843 **Table 3: Bioreactor-derived Population 2 end-point isolate genomes.**

| Isolate                           | DAP MIC | <i>divIVA</i> | <i>cls</i> | <i>orf_771</i> | von Willebrand Factor A homologue | <i>perR</i> | <i>Orf_923</i> | <i>orf_1323</i> | <i>recA</i> | <i>rpoB</i> | <i>Orf_2201</i> | <i>mraY</i> | <i>orf_2504</i> | <i>orf_2563</i> | <i>Orf_2597</i> | <i>orf_2902</i> (Plasmid 1) | <i>repA</i> (Plasmid 1) | VAN Plasmid | <i>orf_3019</i> (Plasmid 3) |
|-----------------------------------|---------|---------------|------------|----------------|-----------------------------------|-------------|----------------|-----------------|-------------|-------------|-----------------|-------------|-----------------|-----------------|-----------------|-----------------------------|-------------------------|-------------|-----------------------------|
| R2P90                             | 64      | Q75K          | A20D       |                |                                   |             |                |                 |             |             |                 |             |                 |                 |                 |                             |                         |             |                             |
| R2P6                              | 64      | Q75K          | R218Q      |                |                                   |             |                |                 |             |             |                 |             |                 |                 |                 |                             |                         |             | K334*                       |
| R2P74                             | 64      | Q75K          | A20D       |                | D138D                             |             |                |                 |             | -153        |                 |             |                 |                 |                 | Q249H                       |                         |             |                             |
| R2P76                             | 32      | Q75K          | A20D       |                |                                   |             |                |                 |             |             |                 |             |                 |                 |                 |                             |                         |             |                             |
| R2P59                             | 32      | Q75K          |            |                |                                   |             | Δ18 bp E222K   |                 |             |             |                 |             |                 | F227*           |                 |                             |                         |             |                             |
| R2P61                             | 32      | Q75K          | R211L      |                | E342K                             |             |                |                 |             |             |                 | G214D       | -5              |                 |                 |                             |                         |             |                             |
| R2P29                             | 16      |               |            | -626           |                                   |             |                |                 |             |             |                 |             |                 |                 |                 |                             |                         |             |                             |
| R2P63                             | 16      | Q75K          | H215R      |                | E342K                             |             |                |                 |             |             |                 |             |                 |                 |                 |                             | +207                    | Δ           |                             |
| R2P91                             | 8       |               |            | -626           |                                   | G109E       |                |                 |             |             |                 |             |                 |                 |                 |                             |                         |             |                             |
| <b>Total Strains with Changes</b> |         | <b>7</b>      | <b>6</b>   | <b>2</b>       | <b>3</b>                          | <b>1</b>    | <b>1</b>       | <b>1</b>        | <b>1</b>    | <b>1</b>    | <b>1</b>        | <b>1</b>    | <b>1</b>        | <b>1</b>        | <b>1</b>        | <b>1</b>                    | <b>1</b>                | <b>1</b>    | <b>1</b>                    |

844





## 1 **Figures**

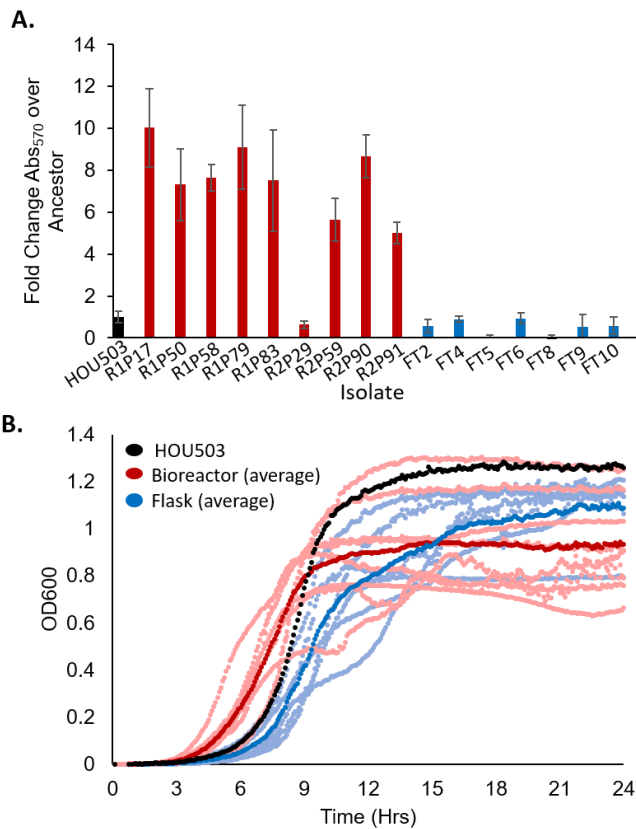

2

3 **Fig. 1: Varying the adaptive environment selects for distinctive and divergent phenotypes.**

4 The bioreactor (red) and flask (blue) environments evolve distinctly different phenotypes. **A.** A  
5 crystal violet assay was used to quantify biofilm formation of 16 end-point isolates and is  
6 reported as the fold change crystal violet Abs<sub>570</sub> over the ancestor. All bioreactor isolates (except  
7 R2P29) produced significantly more biofilm than the ancestor ( $p < 0.05$ ) using two-sided T-test.  
8 Error bars represent standard deviation. **B.** Growth rates were performed in a microplate reader  
9 in triplicate for all end-point isolates. The dark red and blue markers indicate the average growth  
10 for each adaptive environment with the lighter shades showing the average growth of individual  
11 isolates.

12

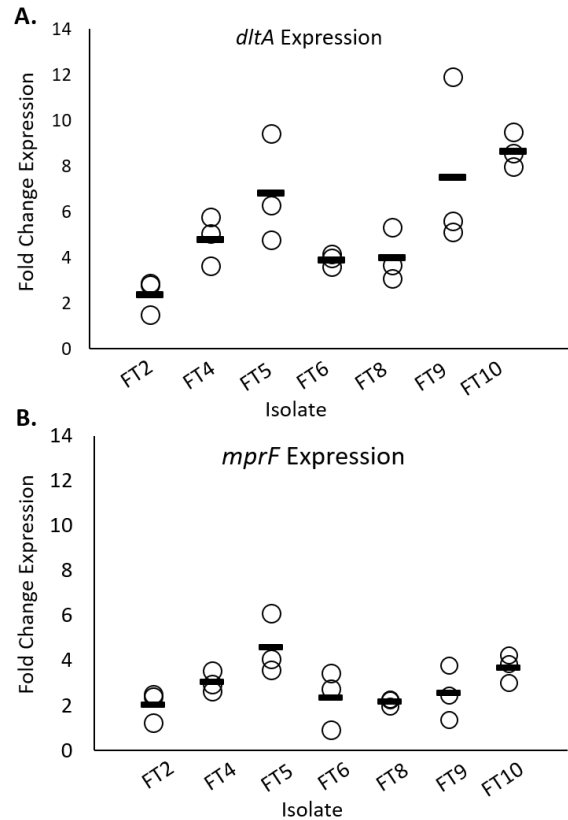

13

14 **Fig. 2: Flask-transfer isolates with mutations in *yvcRS* had upregulated *dltA* and *mprF***  
15 **transcripts.** qPCR was used to measure transcript levels of flask-transfer isolates using *gdhIV* as  
16 reference. **A.** *dltA* transcript levels compared to ancestor. **B.** *mprF* transcript levels compared to  
17 ancestor.

18

19

20

21

22

23 **Fig. 3: Isolates with mutations in *yvcRS* had a**  
24 **more positively charged cell surface and bound**  
25 **less BDP:DAP than the ancestor, HOU503. A** The  
26 relative cell surface charge was determined by  
27 incubation with PLL:FITC. Cells that bind less  
28 PLL:FITC have a more positive cell surface charge.  
29 \*Shows statistical significance ( $p < 0.05$ ) using two-  
30 sided T-test. ImageJ was used for quantification.  
31 Physical images can be viewed in Fig. S2. **B.**  
32 Isolates were incubated with BDP:DAP to  
33 determine DAP binding patterns. **C.** Quantification  
34 of BDP:DAP binding per cell. \*Shows statistical  
35 significance ( $p < 0.05$ ) using two-sided T-test. ImageJ  
36 was used for quantification.

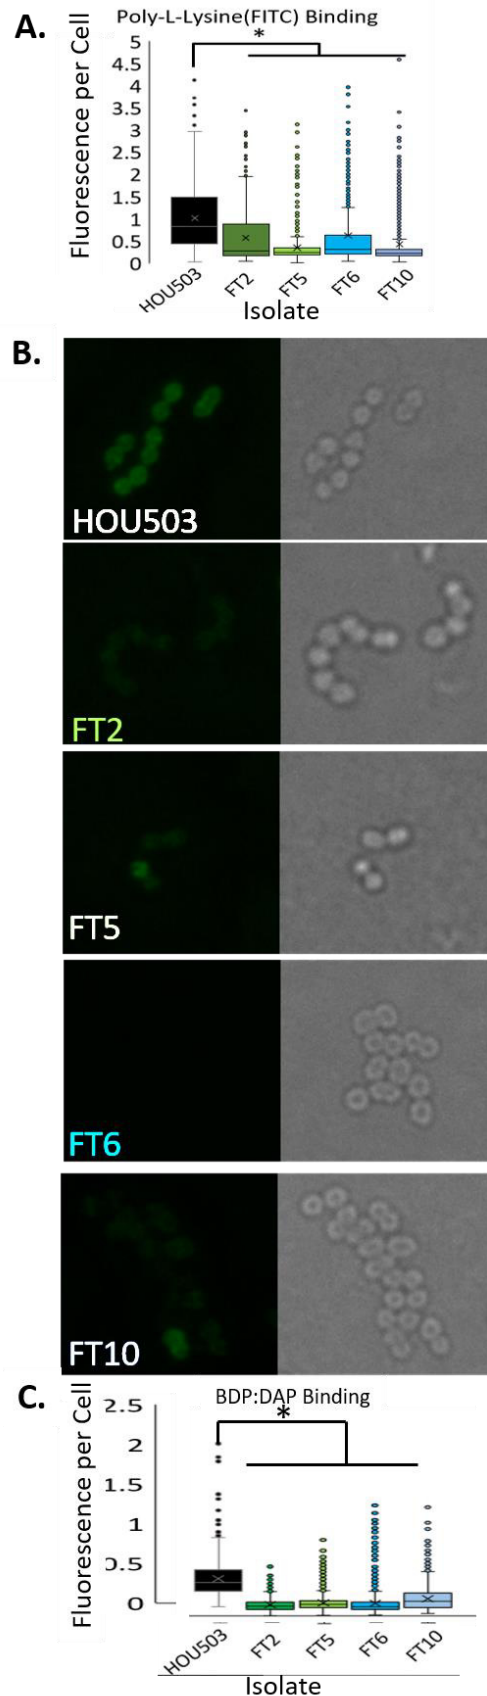

37  
38  
39  
40  
41  
42  
43  
44

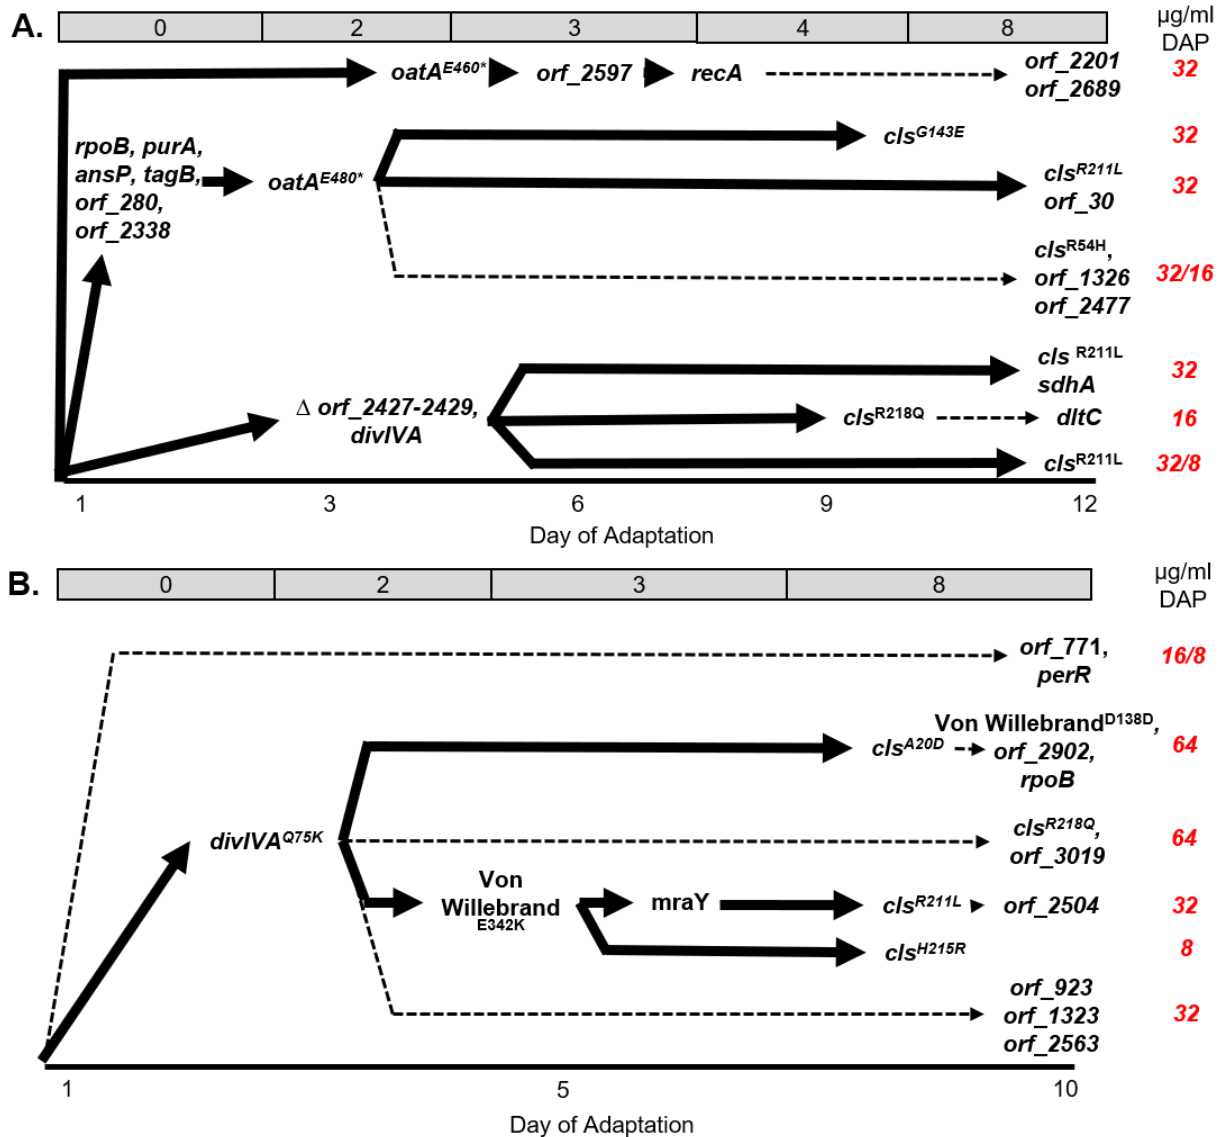

45

46 **Fig. 4: Adaption within a bioreactor environment favoring rapid growth and biofilm**  
 47 **formation produced two predominant evolutionary trajectories.** Combining the WGS data  
 48 from end-point isolates that identified genetic linkage with the metagenomic frequency data over  
 49 time, established the likely sequence of events that resulted in DAP resistant trajectories. Dashed  
 50 lines indicate that the frequency of the subsequent mutation(s) identified in specific end-point  
 51 isolates were below the level of detection (<3%) in the overall bioreactor population. The low  
 52 frequency of these mutations within the population suggests that they were acquired towards the

53 end of adaptation. The DAP concentration each day of the experiment is across the top, in gray.

54 Final DAP MICs of each trajectory are denoted in red at the right. **A.** Population 1 evolved 2

55 main trajectories opening with either a mutation in *oatA* or  $\Delta 1915$  followed by additional

56 mutations, including *cls*. **B.** Population 2 evolved one main trajectory with a mutation in *divIVA*

57 followed by mutations in *cls*.

58

59

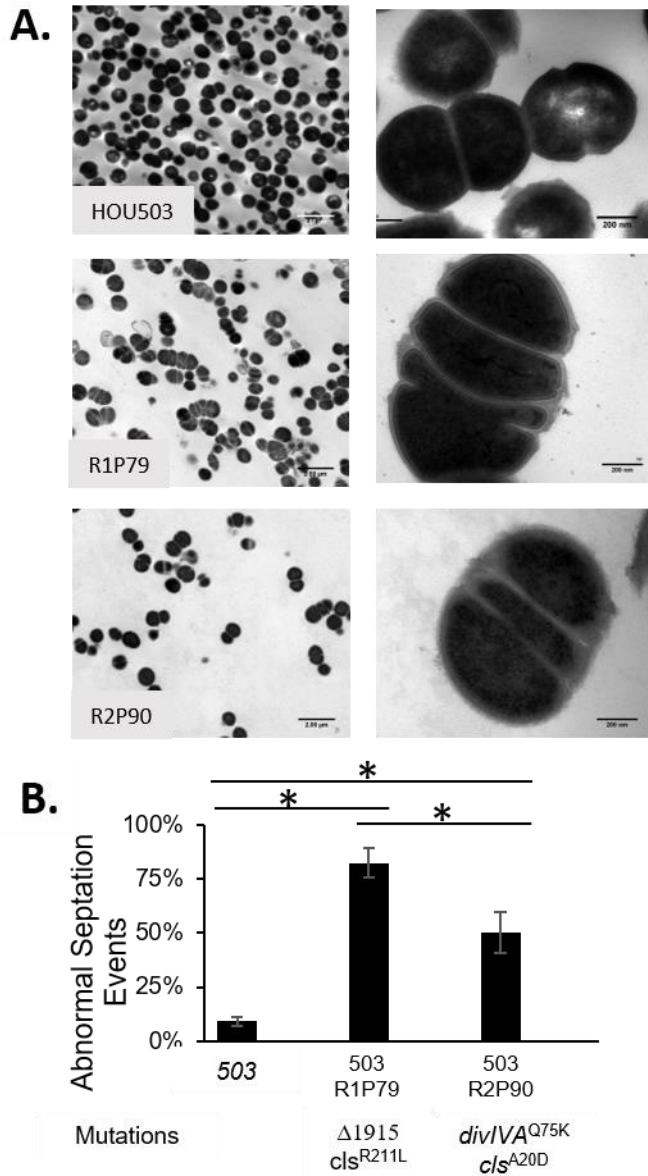

60

61 **Fig. 5: Bioreactor isolates containing *divIVA* associated mutations produced abnormal**  
62 **septa. A.** TEM was used at 5000x (left) and 50000x (right) to observe cellular morphology of  
63 end-point isolates containing mutations in *divIVA*. **B.** The percent of abnormal septal events was  
64 determined. \*Shows statistical significance ( $p < 0.05$ ) using two-sided T-test.

65

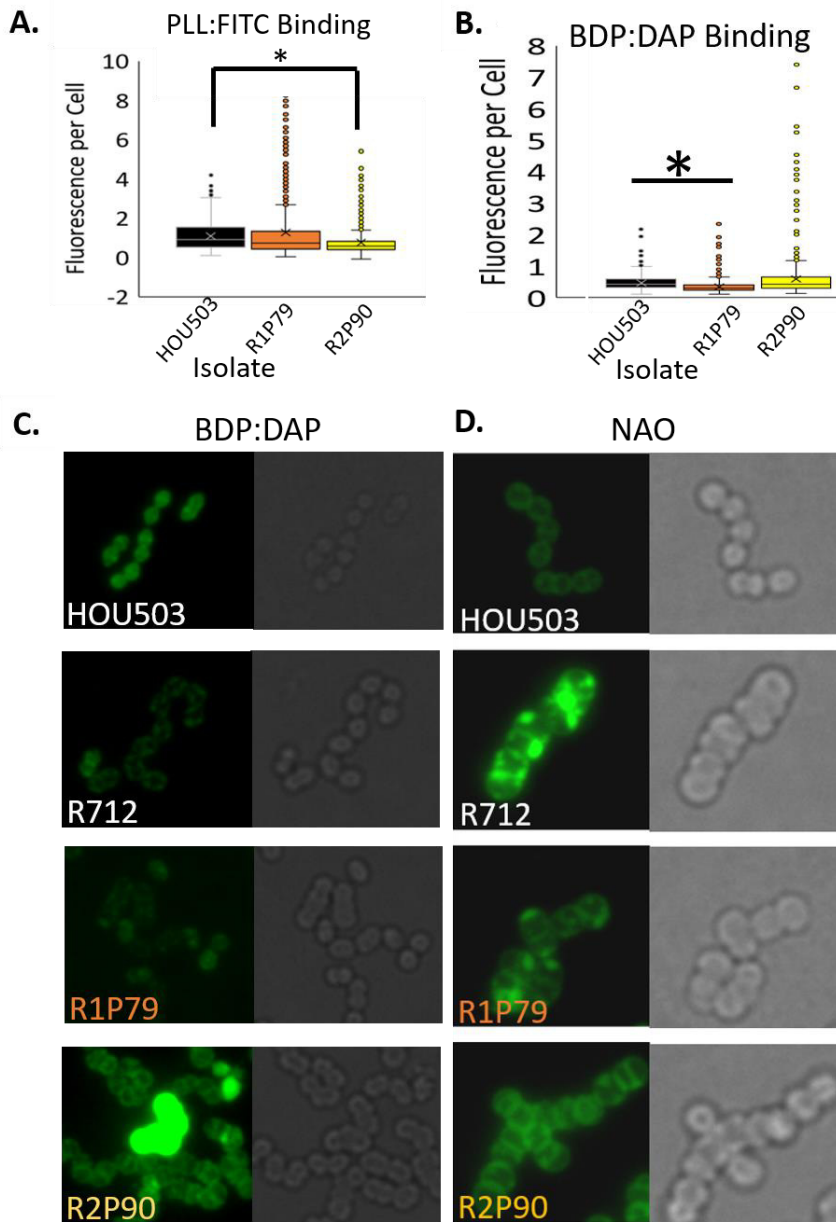

66

67 **Fig. 6: Bioreactor Isolates with *divIVA* associated mutations produced more complex DAP**

68 **resistance phenotypes. A.** The relative cell surface charge was determined by incubating the

69 isolates with PLL:FITC Cells that bind less PLL:FITC have a more positive cell surface charge

70 R2P90 bound significantly less PLL:FITC than the ancestor indicating a more positively charged

71 cell surface. \*Shows statistical significance ( $p < 0.05$ ) using two-sided T-test. Physical images can

72 be viewed in Supplementary Fig. 2. **B.** Quantification of BDP:DAP binding per cell using



73 ImageJ. \*Shows statistical significance ( $p < 0.05$ ) using two-sided T-test. **C.** Isolates were  
74 incubated with BDP:DAP to determine DAP binding patterns. *EEfc* R712 acts as a control to  
75 show the redistribution of binding phenotype. **D.** Isolates were incubated with NAO to determine  
76 phospholipid microdomain patterning. *Efc* R712 acts as a control to show the redistribution  
77 phenotype.

78

79

80

81

82

83

84

85

86

87

88

89

90

91

92 **Fig. 7: Bioreactor-derived isolates with mutations in**  
93 ***oatA* had decreased peptidoglycan O-acetylation and**  
94 **increased cell surface charge, consistent with**  
95 **reduced BDP:DAP binding. A.** Lysozyme discs  
96 containing decreasing concentrations (200, 100, 10, 0  
97 mg/ml) were overlaid on bacterial lawns. R1P50 and  
98 R1P83 both have larger zones of inhibition around  
99 lysosome soaked discs indicating a loss in O-  
100 acetylation. **B.** The relative cell surface charge was  
101 determined by incubating the isolates with PLL:FITC.  
102 Cells that bind less PLL:FITC have a more positive cell  
103 surface charge. \*Shows statistical significance ( $p < 0.05$ )  
104 using two-sided T-test. ImageJ was used for  
105 quantification. Physical images can be viewed in  
106 Supplementary Fig. 2. **C.** Isolates were incubated with  
107 BDP:DAP to determine DAP binding patterns. **D.**  
108 Quantification of BDP:DAP binding per cell. \*Shows  
109 statistical significance ( $p < 0.05$ ) using two-sided T-test.  
110 ImageJ was used for quantification.

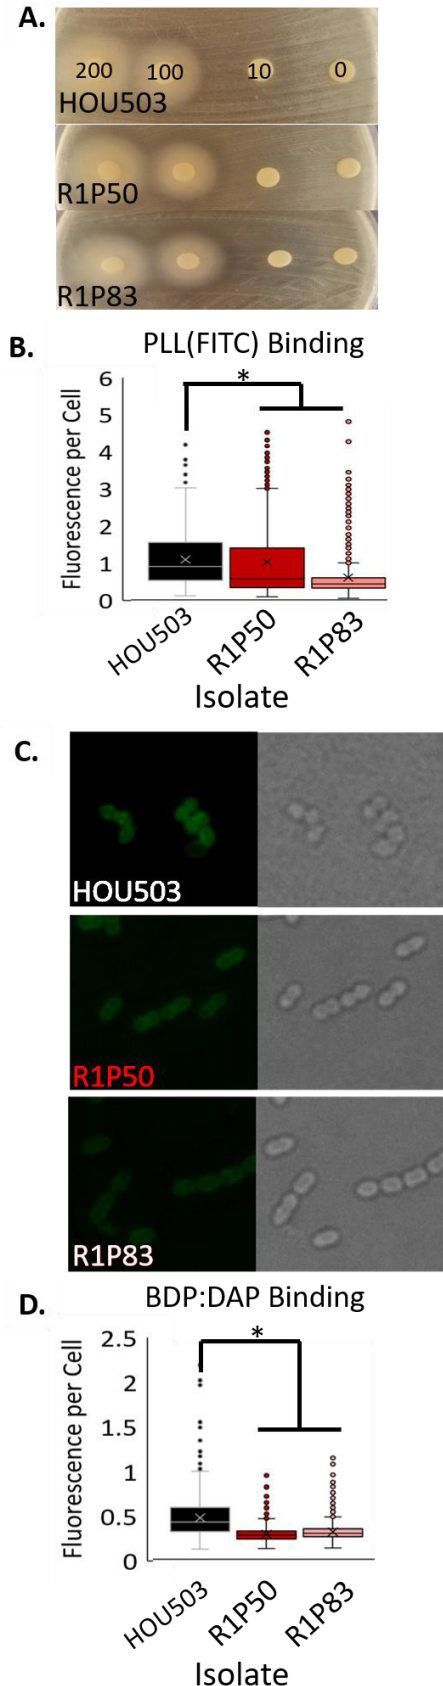

111  
112  
113  
114  
115  
116
